# Supplementary material
Source: PubMed Central journal article supplement (PMC7668558)
Supplement: NIHMS1640709-supplement-SI.pdf [file NIHMS1640709-supplement-SI.pdf]

## **Multi-model estimates of premature human mortality due to intercontinental transport of air pollution – Supplemental Material**

Ciao-Kai Liang<sup>1</sup>, J. Jason West<sup>1</sup>, Raquel A. Silva<sup>2</sup>, Huisheng Bian<sup>3</sup>, Mian Chin<sup>4</sup>, Yanko Davila<sup>5</sup>, Frank J. Dentener<sup>6</sup>, Louisa Emmons<sup>7</sup>, Johannes Flemming<sup>8</sup>, Gerd Folberth<sup>9</sup>, Daven Henze<sup>6</sup>, Ulas Im<sup>10</sup>, Jan Eiof Jonson<sup>11</sup>, Terry J. Keating<sup>12</sup>, Tom Kucsera<sup>13</sup>, Allen Lenzen<sup>14</sup>, Meiyun Lin<sup>15</sup>, Marianne Tronstad Lund<sup>16</sup>, Xiaohua Pan<sup>17</sup>, Rokjin J. Park<sup>18</sup>, R. Bradley Pierce<sup>19</sup>, Takashi Sekiya<sup>20</sup>, Kengo Sudo<sup>20</sup>, Toshihiko Takemura<sup>21</sup>

<sup>1</sup>Department of Environmental Sciences and Engineering, University of North Carolina at Chapel Hill, Chapel Hill, North Carolina, USA

<sup>2</sup>Oak Ridge Institute for Science and Education at US Environmental Protection Agency, Research Triangle Park, NC, USA

<sup>3</sup>Goddard Earth Sciences and Technology Center, University of Maryland, Baltimore, MD, USA

<sup>4</sup>Earth Sciences Division, NASA Goddard Space Flight Center, Greenbelt, MD, USA

<sup>5</sup>Department of Mechanical Engineering, University of Colorado, Boulder, CO, USA

<sup>6</sup>European Commission, Joint Research Center, Ispra, Italy

<sup>7</sup>Atmospheric Chemistry Observations and Modeling Laboratory, National Center for Atmospheric Research (NCAR), Boulder, CO, USA

<sup>8</sup>European Center for Medium-Range Weather Forecasts, Reading, UK

<sup>9</sup>UK Met Office Hadley Centre, Exeter, UK

<sup>10</sup>Aarhus University, Department of Environmental Science, Frederiksborgvej, DK-4000, Roskilde, Denmark.

<sup>11</sup>Norwegian Meteorological Institute, Oslo, Norway

<sup>12</sup>US Environmental Protection Agency, Research Triangle Park, NC, USA

<sup>13</sup>Universities Space Research Association, Greenbelt, MD, USA

<sup>14</sup>Space Science & Engineering Center, University of Wisconsin -Madison, WI, USA

<sup>15</sup>Atmospheric and Oceanic Sciences, Princeton University, Princeton, NJ, USA

<sup>16</sup>CICERO Center for International Climate Research, Oslo, Norway

<sup>17</sup>Earth System Science Interdisciplinary Center, University of Maryland, College Park, MD, USA

<sup>18</sup>Seoul National University, Seoul, Korea

<sup>19</sup>NOAA National Environmental Satellite, Data, and Information Service, Madison, WI, USA

<sup>20</sup>Nagoya University, Furocho, Chigusa-ku, Nagoya, Japan

<sup>21</sup>Research Institute for Applied Mechanics, Kyushu University, Fukuoka, Japan

Table S1 –Models that reported O<sub>3</sub> and PM<sub>2.5</sub> (mmrpm2p5) concentrations for TF-HTAP2, with type of O<sub>3</sub> (h – hourly, d– daily and m – monthly) and monthly PM<sub>2.5</sub> output with the function used by models to calculate PM<sub>2.5</sub> from species concentrations. (Data are available upon request from <http://aerocom.met.no>).

| Model                            | Emission perturbation experiment | Institution             | Contact                                    | Model resolution (lonxlat)          | O <sub>3</sub> | PM <sub>2.5</sub>                                                                                                                                                                    | Reference                                        |
|----------------------------------|----------------------------------|-------------------------|--------------------------------------------|-------------------------------------|----------------|--------------------------------------------------------------------------------------------------------------------------------------------------------------------------------------|--------------------------------------------------|
| CAM-Chem                         | -20% regions                     | NCAR                    | Louisa Emmons                              | 2.5 <sup>0</sup> x1.9 <sup>0</sup>  | m              |                                                                                                                                                                                      | Tilmes et al. (2016)                             |
| CHASER_T42                       | -20% regions<br>-20% sectors     | NAGOYA,JA<br>MSTEC,NIES | Kengo Sudo<br>Takashi Sekiya               | 2.8 <sup>0</sup> x2.8 <sup>0</sup>  | h              | SO <sub>4</sub> +OC+NO <sub>3</sub> +NH <sub>4</sub> + BC+<br>Dust(fine)+SS(fine)                                                                                                    | Sudo et al. (2002)                               |
| CHASER_T106                      | -20% regions                     | as above                | as above                                   | 1.1 <sup>0</sup> x1.1 <sup>0</sup>  | m              | SO <sub>4</sub> +OC+NO <sub>3</sub> +NH <sub>4</sub> + BC+<br>Dust(fine)+SS(fine)                                                                                                    | as above                                         |
| #C-IFS                           | -20% regions                     | ECMWF                   | Johannes Flemming                          | 0.7 <sup>0</sup> x0.7 <sup>0</sup>  | m              | SS1 + 0.5*SS2 + Dust1 + Dust2 +<br>0.7*(OM1 + OM2 + SO <sub>4</sub> )                                                                                                                | Flemming et al. (2015)                           |
| EMEPv48                          | -20% regions                     | Met No                  | Jan Eiof Jonson                            | 0.5 <sup>0</sup> x0.5 <sup>0</sup>  | m              | SO <sub>4</sub> +OA+NO <sub>3</sub> +NH <sub>4</sub> +Dust+BC+SS                                                                                                                     | Simpson et al. (2012)                            |
| GEOS5                            | -20% regions                     | NASA GSFC               | Huisheng Bian,<br>Mian Chin<br>Xiaohua Pan | 1.3 <sup>0</sup> x1.0 <sup>0</sup>  | -              | 1.375* SO <sub>4</sub> +OA+0.15*Dust+BC+SS                                                                                                                                           | Rienecker et al. (2008)<br>Colarco et al. (2010) |
| <sup>s</sup> GEOSCHEMA<br>DJOINT | -20% regions<br>-20% sectors     | Univ.Col.<br>Boulder    | Daven Henze                                | 2.5 <sup>0</sup> x2.0 <sup>0</sup>  | m              | 1.33*(SO <sub>4</sub> +NO <sub>3</sub> +NH <sub>4</sub> )+BC <sub>pi</sub> +BC <sub>po</sub><br>+1.4*(1.16*OC <sub>pi</sub> +OC <sub>po</sub> )+1.16*SO<br>A+Dust1+0.38*Dust2+1.86SS | Henze et al. (2007)                              |
| GEOS-Chem                        | -20% regions                     | SNU                     | Rokjin Park                                | 2.5 <sup>0</sup> x2.0 <sup>0</sup>  | d              | -                                                                                                                                                                                    | Bey et al. (2001a)                               |
| GFDL_AM3                         | -20% regions                     | NOAA                    | Meiyun Lin                                 | 1.2 <sup>0</sup> x1.0 <sup>0</sup>  | h              | -                                                                                                                                                                                    | Lin et al. (2012)<br>Lin et al. (2017)           |
| GOCART                           | -20% regions<br>-20% sectors     | NASA GSFC               | Tom Kucsera                                | 1.3 <sup>0</sup> x1.0 <sup>0</sup>  | -              | 1.375*SO <sub>4</sub> +OA+0.15*Dust+BC                                                                                                                                               | Chin et al. (2002)                               |
| HadGEM2-ES                       | -20% regions<br>-20% sectors     | UK Met Office           | Gerd Folberth                              | 2.5 <sup>0</sup> x3.75 <sup>0</sup> | h              | -                                                                                                                                                                                    | Collins et al. (2011)<br>Jones et al. (2011)     |
| OsloCTM3.v2                      | -20% regions<br>-20% sectors     | CICERO                  | Marianne Tronstad<br>Lund                  | 2.8 <sup>0</sup> x2.8 <sup>0</sup>  | m              | -                                                                                                                                                                                    | Søvde et al. (2012)                              |
| RAQMS                            | -20% regions                     | NOAA/NESD<br>IS         | Bradket Pierce<br>Allen Lenzen             | 1.0 <sup>0</sup> x1.0 <sup>0</sup>  | m              | -                                                                                                                                                                                    | Pierce et al. (2007)                             |
| SPRINTARS                        | -20% regions<br>-20% sectors     | RIAM                    | Toshihiko<br>Takemura                      | 1.1 <sup>0</sup> x1.1 <sup>0</sup>  | -              | SO <sub>4</sub> +OA+Dust+BC+SS                                                                                                                                                       | Watanabe et al. (2010)<br>Takemura et al. (2005) |

#The C-IFS SS1 and SS2, dust 1 and dust 2 refer to two modes of aerosol size distribution.

<sup>s</sup>The GEOSCHEMADJOINT pi and po of BC and OC refer to hydrophilic and hydrophobic components, and dust 1 and dust 2 refer to two modes of aerosol size distribution.

Table S2. Statistical model evaluation for the maximum 3-month average of daily 1-hour maximum ozone, comparing TOAR observations with individual model simulations and the ensemble average, in TF-HTAP2 regions (Figure. S2).

|                        |        | Ensemble | CAMchem | CHASER_T42 | CHASER_T106 | C-IFS_v2 | EMEP_rv48 | GEOSCHEMA<br>DJOINT | GEOS-Chem | GFDL_AM3 | HadGEM2-ES | OsloCTM3.v2 | RAQMS  |
|------------------------|--------|----------|---------|------------|-------------|----------|-----------|---------------------|-----------|----------|------------|-------------|--------|
| NAM<br>(1,417 sites)   | NMB(%) | 14.1%    | 21.9%   | 21.1%      | 30.8%       | -8.9%    | 20.1%     | 31.6%               | 32.3%     | 25.1%    | 5.4%       | -18.1%      | -6.3%  |
|                        | NME(%) | 17.6%    | 22.7%   | 25.9%      | 32.3%       | 16.6%    | 24.9%     | 32.5%               | 33.5%     | 26.4%    | 13.8%      | 21.0%       | 12.5%  |
|                        | R      | 0.52     | 0.63    | 0.38       | 0.44        | 0.29     | 0.42      | 0.51                | 0.47      | 0.49     | 0.6        | 0.35        | 0.46   |
| EUR<br>(1,887 sites)   | NMB(%) | 4.3%     | 9.0%    | 7.0%       | 21.3%       | -23.0%   | 15.8%     | 14.9%               | 10.1%     | 14.0%    | 11.7%      | -24.1%      | -10.1% |
|                        | NME(%) | 9.8%     | 12.5%   | 13.2%      | 22.7%       | 24.5%    | 17.8%     | 16.5%               | 13.3%     | 15.4%    | 17.7%      | 27.1%       | 15.1%  |
|                        | R      | 0.55     | 0.55    | 0.41       | 0.48        | 0.28     | 0.47      | 0.48                | 0.49      | 0.61     | 0.31       | 0.37        | 0.48   |
| SAS<br>(4 sites)       | NMB(%) | 25.3%    | 37.9%   | 16.1%      | 29.1%       | -2.4%    | 40.0%     | 42.0%               | 40.6%     | 45.0%    | 31.1%      | -24.5%      | 23.9%  |
|                        | NME(%) | 25.3%    | 37.9%   | 16.1%      | 29.1%       | 15.6%    | 40.0%     | 42.0%               | 40.6%     | 45.0%    | 41.6%      | 24.5%       | 23.9%  |
|                        | R      | 0.30     | 0.41    | 0.67       | 0.31        | 0.14     | 0.28      | 0.52                | 0.40      | 0.03     | -0.29      | -0.22       | 0.45   |
| EAS<br>(1,156 sites)   | NMB(%) | 5.2%     | 10.8%   | 1.2%       | 19.8%       | -26.4%   | -3.1%     | 24.5%               | 13.0%     | 18.7%    | 10.9%      | 4.0%        | -16.5% |
|                        | NME(%) | 13.2%    | 16.1%   | 16.5%      | 22.6%       | 28.3%    | 17.0%     | 26.1%               | 18.4%     | 19.9%    | 16.9%      | 14.8%       | 22.3%  |
|                        | R      | 0.08     | 0.12    | 0.05       | 0.14        | -0.15    | -0.06     | 0.07                | 0.06      | 0.25     | 0.03       | 0.12        | -0.09  |
| MDE<br>(13 sites)      | NMB(%) | 4.9%     | 20.8%   | 4.3%       | 7.9%        | -30.5%   | 6.7%      | 21.2%               | 16.0%     | 0.1%     | 20.3%      | 10.4%       | -22.9% |
|                        | NME(%) | 12.2%    | 22.1%   | 14.1%      | 13.7%       | 30.5%    | 18.7%     | 22.0%               | 17.6%     | 15.0%    | 20.7%      | 16.9%       | 27.2%  |
|                        | R      | -0.09    | -0.05   | -0.49      | -0.2        | -0.09    | -0.21     | 0.26                | 0.17      | -0.1     | 0.54       | 0.18        | -0.21  |
| RBU<br>(4 sites)       | NMB(%) | -11.2%   | -12.2%  | -9.7%      | -6.9%       | -27.7%   | 5.4%      | 2.4%                | 0.1%      | 1.4%     | -23.1%     | -35.3%      | -17.9% |
|                        | NME(%) | 11.2%    | 12.2%   | 14.3%      | 7.3%        | 27.7%    | 6.4%      | 2.4%                | 1.0%      | 9.1%     | 23.1%      | 35.3%       | 17.9%  |
|                        | R      | 0.98     | 1.00    | 0.71       | 0.97        | 0.26     | 0.94      | 1.00                | 1.00      | 0.92     | 0.97       | 0.67        | 0.93   |
| World<br>(4,655 sites) | NMB(%) | 7.3%     | 13.1%   | 9.2%       | 23.0%       | -19.4%   | 11.7%     | 22.5%               | 17.6%     | 19.0%    | 9.5%       | -14.9%      | -10.8% |
|                        | NME(%) | 13.2%    | 16.6%   | 18.0%      | 25.3%       | 23.0%    | 19.8%     | 23.9%               | 20.8%     | 20.4%    | 16.5%      | 21.9%       | 16.4%  |
|                        | R      | 0.53     | 0.56    | 0.36       | 0.47        | 0.24     | 0.30      | 0.51                | 0.45      | 0.55     | 0.48       | 0.47        | 0.38   |

Table S3. Statistical model evaluation for the annual average PM<sub>2.5</sub>, comparing GBD2013 observations with individual model simulations and the ensemble average in each TF-HTAP2 region (Figure. S2).

|                        |        | Ensemble | CHASER | CHASER_t106 | C-IFS_v2 | EMEP_rv48 | GEOSCHEMA<br>DJOINT | GEOS5  | GOCARTv5 | SPRINTARS |
|------------------------|--------|----------|--------|-------------|----------|-----------|---------------------|--------|----------|-----------|
| NAM<br>(757 sites)     | NMB(%) | -10.5%   | 7.4%   | 13.9%       | -28.1%   | -10.1%    | 11.6%               | -7.5%  | -24.9%   | -46.6%    |
|                        | NME(%) | 27.6%    | 39.2%  | 39.5%       | 45.8%    | 29.0%     | 48.5%               | 30.2%  | 35.5%    | 47.8%     |
|                        | R      | 0.50     | 0.42   | 0.43        | 0.13     | 0.56      | 0.45                | 0.36   | 0.44     | 0.47      |
| EUR<br>(1,580 sites)   | NMB(%) | -36.0%   | -27.6% | -29.6%      | -52.3%   | -45.6%    | 31.9%               | -34.0% | -55.1%   | -76.0%    |
|                        | NME(%) | 39.7%    | 35.5%  | 37.2%       | 58.6%    | 47.3%     | 56.4%               | 41.1%  | 56.8%    | 76.0%     |
|                        | R      | 0.73     | 0.49   | 0.46        | 0.47     | 0.55      | 0.25                | 0.65   | 0.67     | 0.64      |
| SAS<br>(189 sites)     | NMB(%) | 19.4%    | 32.3%  | 49.7%       | 8.6%     | 26.1%     | 39.5%               | 36.6%  | -2.5%    | -35.0%    |
|                        | NME(%) | 40.4%    | 48.8%  | 61.4%       | 39.5%    | 48.1%     | 55.5%               | 54.6%  | 33.6%    | 50.2%     |
|                        | R      | 0.60     | 0.55   | 0.57        | 0.49     | 0.52      | 0.60                | 0.45   | 0.56     | -0.09     |
| EAS<br>(390 sites)     | NMB(%) | -10.9%   | 2.6%   | 21.0%       | -50.4%   | -12.1%    | 29.5%               | -9.1%  | -21.8%   | -46.5%    |
|                        | NME(%) | 28.7%    | 31.7%  | 40.5%       | 51.8%    | 37.2%     | 59.9%               | 35.0%  | 32.0%    | 49.9%     |
|                        | R      | 0.65     | 0.57   | 0.56        | 0.61     | 0.63      | 0.56                | 0.61   | 0.63     | 0.48      |
| MDE<br>(29 sites)      | NMB(%) | -11.1%   | -30.2% | -42.6%      | 22.8%    | 31.5%     | -52.6%              | 12.3%  | 20.8%    | -50.5%    |
|                        | NME(%) | 21.2%    | 37.9%  | 44.4%       | 34.1%    | 46.1%     | 52.6%               | 22.8%  | 27.6%    | 50.5%     |
|                        | R      | 0.84     | 0.33   | 0.74        | 0.81     | 0.43      | 0.54                | 0.91   | 0.91     | 0.67      |
| RBU<br>(2 sites)       | NMB(%) | -49.7%   | -42.7% | -37.4%      | -58.8%   | -64.6%    | -19.8%              | -45.4% | -55.0%   | -74.1%    |
|                        | NME(%) | 49.7%    | 42.7%  | 37.4%       | 58.8%    | 64.6%     | 38.2%               | 45.4%  | 55.0%    | 74.1%     |
|                        | R      | 1.00     | 1.00   | 1.00        | 1.00     | 1.00      | 1.00                | 1.00   | 1.00     | 1.00      |
| World<br>(3,157 sites) | NMB(%) | -23.1%   | -12.7% | -7.4%       | -39.7%   | -26.3%    | 20.3%               | -18.7% | -39.4%   | -60.9%    |
|                        | NME(%) | 35.4%    | 37.4%  | 40.0%       | 52.2%    | 41.8%     | 55.1%               | 38.6%  | 46.6%    | 62.9%     |
|                        | R      | 0.77     | 0.71   | 0.71        | 0.66     | 0.71      | 0.65                | 0.74   | 0.77     | 0.63      |

Table S4 - Regional and global population (for age 25 and older) and average cause-specific baseline mortality rates (also for age 25 and older): chronic respiratory mortality (RESP), ischemic heart disease (IHD), cerebrovascular disease (STROKE), chronic obstructive pulmonary disease (COPD) and lung cancer (LC).

| Regions | Population<br>(million people) | Mortality (deaths per year per 1,000 people). |      |      |        |      |
|---------|--------------------------------|-----------------------------------------------|------|------|--------|------|
|         |                                | RESP                                          | IHD  | COPD | STROKE | LC   |
| NAM     | 231.7                          | 0.88                                          | 2.71 | 0.73 | 0.84   | 0.80 |
| EUU     | 433.3                          | 0.72                                          | 2.84 | 0.53 | 1.77   | 0.70 |
| SAS     | 730.9                          | 1.73                                          | 1.68 | 1.33 | 0.94   | 0.14 |
| EAS     | 1,047.3                        | 1.18                                          | 1.18 | 1.05 | 2.07   | 0.63 |
| MDE     | 102.4                          | 0.34                                          | 2.11 | 0.16 | 1.05   | 0.13 |
| RBU     | 194.4                          | 0.54                                          | 6.80 | 0.42 | 3.64   | 0.47 |
| World   | 3,838.8                        | 0.97                                          | 1.86 | 0.76 | 1.57   | 0.41 |

Sources: Population - Oak Ridge National Laboratory's Landscan 2011 Global Population Dataset (Bright et al. 2012). Baseline mortality rates - Cause-specific baseline mortality rates for 187 countries (IHME, 2013)

Table S5 – Difference in global population-weighted anthropogenic O<sub>3</sub> concentrations (ppb) for 20% emission reduction scenarios relative to the baseline for the year 2010. O<sub>3</sub> is seasonal average of 1-hr. daily maximum O<sub>3</sub> for consecutive 6 months, a metric commonly used in health impact evaluations. All numbers are rounded to the nearest hundredth.

| Models              | 20% emission reduction scenarios |            |            |            |            |            |            |            |            |            |            |
|---------------------|----------------------------------|------------|------------|------------|------------|------------|------------|------------|------------|------------|------------|
|                     | BASE                             | GLO        | NAM        | EUR        | SAS        | EAS        | MDE        | RBU        | PIN        | TRN        | RES        |
| CAM-Chem            | 56.49                            | -2.29      | -0.10      | -0.05      | -0.58      | -0.23      | -0.02      | 0.06       | ---        | ---        | ---        |
| CHASER_T42          | 56.27                            | -3.64      | -0.26      | -0.22      | -1.06      | -1.04      | -0.11      | -0.08      | -1.51      | -1.35      | -0.53      |
| CHASER_T106         | 56.38                            | -3.30      | -0.23      | -0.19      | -1.03      | -0.91      | ---        | ---        | ---        | ---        | ---        |
| C-IFS               | 38.73                            | -1.95      | -0.11      | -0.04      | -0.75      | -0.28      | ---        | ---        | ---        | ---        | ---        |
| EMEPv48             | 59.41                            | -3.13      | -0.24      | -0.18      | -0.93      | -0.77      | -0.09      | -0.13      | ---        | ---        | ---        |
| GEOSCHEMADJ<br>OINT | 58.97                            | -2.36      | -0.18      | -0.08      | -0.69      | -0.41      | -0.09      | -0.03      | -0.83      | -0.92      | -0.46      |
| GEOS-Chem           | 57.59                            | -2.45      | -0.21      | ---        | ---        | -0.62      | ---        | ---        | ---        | ---        | ---        |
| GFDL_AM3            | 63.75                            | -3.15      | -0.22      | -0.20      | ---        | -0.49      | ---        | ---        | ---        | ---        | ---        |
| HadGEM2-ES          | 58.03                            | -3.18      | -0.23      | -0.20      | -1.30      | -0.51      | -0.07      | -0.09      | -1.02      | -1.29      | -0.81      |
| OsloCTM3.v2         | 38.95                            | -2.79      | -0.16      | -0.12      | -0.87      | -0.63      | -0.14      | -0.03      | -1.09      | -0.97      | -0.47      |
| RAQMS               | 46.62                            | ---        | ---        | ---        | ---        | -0.45      | ---        | ---        | ---        | ---        | ---        |
| Multi-model mean    | 53.74±8.03                       | -2.82±0.53 | -0.19±0.07 | -0.14±0.07 | -0.90±0.22 | -0.58±0.25 | -0.09±0.04 | -0.05±0.06 | -1.11±0.25 | -1.13±0.19 | -0.57±0.14 |

Table S6 – Difference in global population-weighted anthropogenic PM<sub>2.5</sub> concentrations (µg/m<sup>3</sup>) for 20% emission reduction scenarios relative to the baseline for the year 2010. PM<sub>2.5</sub> is the annual average. All numbers are rounded to the nearest hundredth.

| Models              | 20% emission reduction scenarios |            |            |            |            |            |            |            |            |            |            |
|---------------------|----------------------------------|------------|------------|------------|------------|------------|------------|------------|------------|------------|------------|
|                     | BASE                             | GLO        | NAM        | EUR        | SAS        | EAS        | MDE        | RBU        | PIN        | TRN        | RES        |
| CHASER_T42          | 27.02                            | -4.09      | -0.12      | -0.18      | -1.31      | -1.77      | -0.12      | -0.05      | -1.94      | -0.47      | -1.28      |
| CHASER_T106         | 30.49                            | -4.64      | -0.11      | -0.18      | -1.48      | -2.00      | ---        | ---        | ---        | ---        | ---        |
| C-IFS               | 23.67                            | -1.42      | -0.03      | -0.03      | -0.47      | -0.56      | ---        | ---        | ---        | ---        | ---        |
| EMEPv48             | 26.55                            | -4.23      | -0.08      | -0.14      | -1.30      | -1.54      | -0.08      | -0.07      | ---        | ---        | ---        |
| GEOS5               | 30.85                            | -3.64      | -0.05      | -0.08      | -1.39      | -1.42      | -0.05      | -0.03      | ---        | ---        | ---        |
| GEOSCHEMADJO<br>INT | 30.36                            | -6.02      | -0.15      | -0.34      | -2.05      | -2.79      | -0.12      | -0.09      | -2.07      | -0.99      | -1.54      |
| GOCART              | 24.42                            | -2.34      | -0.04      | -0.07      | -0.81      | -0.96      | -0.05      | -0.03      | -1.06      | -0.10      | -1.18      |
| SPRINTARS           | 14.50                            | -1.51      | -0.03      | -0.06      | -0.45      | -0.59      | -0.04      | -0.01      | -0.76      | -0.06      | -0.68      |
| Multi-model mean    | 25.98±5.05                       | -3.49±1.51 | -0.08±0.04 | -0.13±0.09 | -1.16±0.51 | -1.45±0.71 | -0.08±0.03 | -0.05±0.03 | -1.46±0.56 | -0.40±0.37 | -1.17±0.31 |

Table S7 – Global O<sub>3</sub>-related respiratory mortality for the year 2010 baseline, showing the deterministic mean. All numbers are rounded to three significant figures or the nearest 100 deaths.

| Models           | Receptors       |              |              |                |                 |             |             |
|------------------|-----------------|--------------|--------------|----------------|-----------------|-------------|-------------|
|                  | World           | NAM          | EUR          | SAS            | EAS             | MDE         | RBU         |
| CAM-Chem         | 396,000         | 22,600       | 16,600       | 167,000        | 168,000         | 3,700       | 3,400       |
| CHASER_ T42      | 355,000         | 23,200       | 24,000       | 150,000        | 125,000         | 5,700       | 5,200       |
| CHASER_ T106     | 394,000         | 22,500       | 20,300       | 157,000        | 172,000         | 3,600       | 4,400       |
| C-IFS            | 96,700          | 6,000        | 1,400        | 64,400         | 18,700          | 800         | 200         |
| EMEPv48          | 418,000         | 15,400       | 17,600       | 195,000        | 146,000         | 3,300       | 5,200       |
| GEOSCHEMADJOINT  | 391,000         | 22,400       | 17,700       | 178,000        | 132,000         | 5,000       | 4,900       |
| GEOS-Chem        | 381,000         | 22,600       | 15,200       | 178,000        | 130,000         | 4,500       | 4,400       |
| GFDL_AM3         | 494,000         | 22,200       | 23,400       | 224,000        | 170,000         | 3,800       | 5,000       |
| HadGEM2-ES       | 390,000         | 14,200       | 19,700       | 211,000        | 108,000         | 4,700       | 2,500       |
| OsloCTM3.v2      | 73,900          | 3,200        | 2,300        | 36,800         | 23,600          | 2,300       | 100         |
| RAQMS            | 202,000         | 5,700        | 5,500        | 118,900        | 56,300          | 1,200       | 1,400       |
| Multi-model mean | 326,000±131,000 | 16,400±7,600 | 14,900±7,700 | 153,000±55,700 | 114,000 ±53,700 | 3,500±1,500 | 3,300±1,900 |



Table S8 – Global PM<sub>2.5</sub>-related mortality (IHD+Stroke+COPD+LC) for the year 2010 baseline, showing the deterministic mean. All numbers are rounded to three significant figures or the nearest 100 deaths.

| Models           | Receptors         |               |                |                 |                   |               |                |
|------------------|-------------------|---------------|----------------|-----------------|-------------------|---------------|----------------|
|                  | World             | NAM           | EUR            | SAS             | EAS               | MDE           | RBU            |
| CHASER_T42       | 3,070,000         | 98,700        | 230,000        | 797,000         | 1,320,000         | 67,000        | 158,000        |
| CHASER_T106      | 3,270,000         | 109,000       | 229,000        | 845,000         | 1,400,000         | 63,700        | 157,000        |
| C-IFS            | 2,420,000         | 16,800        | 144,000        | 713,000         | 781,000           | 106,000       | 200,000        |
| EMEPv48          | 2,780,000         | 80,600        | 150,000        | 778,000         | 1,170,000         | 100,000       | 128,000        |
| GEOS5            | 3,190,000         | 67,600        | 213,000        | 825,000         | 1,220,000         | 101,000       | 244,000        |
| GEOSCHEMADJOINT  | 3,230,000         | 114,000       | 381,000        | 797,000         | 1,430,000         | 41,000        | 281,000        |
| GOCART           | 2,710,000         | 39,400        | 127,000        | 718,000         | 1,120,000         | 106,000       | 201,000        |
| SPRINTARS        | 1,720,000         | 27,400        | 25,600         | 477,000         | 812,000           | 59,000        | 9,000          |
| Multi-model mean | 2,840,000±494,000 | 77,400±35,300 | 180,000±96,700 | 743,000±110,000 | 1,190,000±231,000 | 75,000±24,000 | 172,000±77,100 |

Table S9—Global avoided O<sub>3</sub>-related respiratory mortality in 20% emission reduction scenarios for the year 2010, showing the deterministic mean. All numbers are rounded to three significant figures or the nearest 100 deaths.

| Models              | 20% emission reduction scenarios |           |             |              |              |         |           |              |              |              |
|---------------------|----------------------------------|-----------|-------------|--------------|--------------|---------|-----------|--------------|--------------|--------------|
|                     | GLO                              | NAM       | EUR         | SAS          | EAS          | MDE     | RBU       | PIN          | TRN          | RES          |
| CAM-Chem            | 34,000                           | 800       | 0           | 12,400       | 3,600        | -700    | -1,300    | ---          | ---          | ---          |
| CHASER_ T42         | 64,900                           | 4,000     | 2,800       | 23,800       | 22,000       | 900     | 1,100     | 27,800       | 23,400       | 9,600        |
| CHASER_ T106        | 58,700                           | 3,500     | 2,500       | 23,000       | 19,300       | ---     | ---       | ---          | ---          | ---          |
| C-IFS               | 32,100                           | 1,600     | 400         | 16,400       | 5,200        | ---     | ---       | ---          | ---          | ---          |
| EMEPv48             | 52,600                           | 3,500     | 2,300       | 20,400       | 14,200       | 1,200   | 2,100     | ---          | ---          | ---          |
| GEOSCHEMADJ<br>OINT | 37,600                           | 2,600     | 900         | 15,100       | 7,800        | 1,000   | 500       | 13,200       | 14,400       | 8,500        |
| GEOS-Chem           | 40,600                           | 3,100     | ---         | ---          | 12,100       | ---     | ---       | ---          | ---          | ---          |
| GFDL_AM3            | 50,300                           | 3,200     | 2,600       | ---          | 9,200        | ---     | ---       | ---          | ---          | ---          |
| HadGEM2-ES          | 54,700                           | 3,300     | 2,600       | 28,600       | 9,700        | 1,100   | 1,200     | 17,000       | 21,002       | 15,100       |
| OsloCTM3.v2         | 46,700                           | 2,200     | 1,400       | 19,100       | 12,100       | 1,600   | 400       | 18,600       | 16,000       | 8,300        |
| RAQMS               | ---                              | ---       | ---         | ---          | 8,600        | ---     | ---       | ---          | ---          | ---          |
| Multi-model<br>mean | 47,200±10,400                    | 2,800±900 | 1,700±1,000 | 19,800±4,900 | 11,200±5,300 | 800±700 | 600±1,000 | 19,200±5,300 | 18,800±3,600 | 10,400±2,800 |

Table S10 –Global avoided PM<sub>2.5</sub>-related mortality (IHD+Stroke+COPD+LC) in 20% emission reduction scenarios for the year 2010, showing the deterministic mean. All numbers are rounded to three significant figures or the nearest 100 deaths.

| Models           | 20% emission reduction scenarios |              |               |               |                |             |               |                |               |              |
|------------------|----------------------------------|--------------|---------------|---------------|----------------|-------------|---------------|----------------|---------------|--------------|
|                  | GLO                              | NAM          | EUR           | SAS           | EAS            | MDE         | RBU           | PIN            | TRN           | RES          |
| CHASER_T42       | 375,000                          | 27,100       | 57,500        | 57,800        | 116,000        | 11,500      | 25,800        | 179,000        | 44,000        | 86,500       |
| CHASER_T106      | 375,000                          | 26,200       | 60,500        | 54,900        | 111,000        | ---         | ---           | ---            | ---           | ---          |
| C-IFS            | 172,000                          | 5,900        | 8,100         | 27,500        | 86,300         | ---         | ---           | ---            | ---           | ---          |
| EMEPv48          | 375,000                          | 21,200       | 55,900        | 57,800        | 113,000        | 3,500       | 33,400        | ---            | ---           | ---          |
| GEOS5            | 266,000                          | 18,000       | 27,100        | 52,900        | 94,700         | 2,300       | 14,000        | ---            | ---           | ---          |
| GEOSCHEMADJOINT  | 435,000                          | 29,000       | 71,000        | 84,300        | 126,000        | 16,100      | 39,000        | 140,000        | 66,000        | 78,900       |
| GOCART           | 231,000                          | 15,200       | 19,600        | 46,000        | 89,600         | 2,500       | 15,000        | 114,000        | 10,300        | 98,100       |
| SPRINTARS        | 225,000                          | 10,900       | 13,200        | 50,000        | 95,600         | 4,500       | 5,600         | 122,000        | 7,800         | 89,500       |
| Multi-model mean | 307,000±88,500                   | 20,600±7,700 | 40,500±23,000 | 57,000±14,800 | 106,000±13,400 | 6,700±5,200 | 22,100±11,700 | 139,000±25,100 | 32,000±24,200 | 88,200±6,900 |

Table S11 O<sub>3</sub>-related deaths in regional reduction scenarios, including the deterministic means, results from the Monte Carlo analysis, and analysis of uncertainty showing the standard deviation and coefficient of variation (%) due to uncertainties from the spread of individual model results, the relative risks (RRs), and baseline mortality rates.

| source | Receptor   | Spread of model |              |            | RRs           |              |            | Baseline rates |              |            | Monte-Carlo analysis |               |               |
|--------|------------|-----------------|--------------|------------|---------------|--------------|------------|----------------|--------------|------------|----------------------|---------------|---------------|
|        |            | mean            | stdev        | CV         | mean          | stdev        | CV         | mean           | stdev        | CV         | mean                 | 2.5%          | 97.5%         |
| NAM    | <b>NAM</b> | <b>1,516</b>    | <b>699</b>   | <b>46%</b> | <b>1,516</b>  | <b>510</b>   | <b>34%</b> | <b>1,516</b>   | <b>154</b>   | <b>10%</b> | <b>1,529</b>         | <b>-169</b>   | <b>4,037</b>  |
|        | ERU        | 325             | 98           | 30%        | 325           | 108          | 33%        | 325            | 38           | 12%        | 327                  | -11           | -797          |
|        | SAS        | 165             | 701          | 425%       | 165           | 55           | 34%        | 165            | 27           | 17%        | 172                  | -246          | -685          |
|        | EAS        | 509             | 262          | 52%        | 509           | 170          | 33%        | 509            | 45           | 9%         | 527                  | -910          | 2,209         |
|        | MDE        | 32              | 10           | 31%        | 32            | 11           | 33%        | 32             | 6            | 18%        | 33                   | 2             | 82            |
|        | RBU        | 66              | 20           | 31%        | 66            | 22           | 33%        | 66             | 8            | 12%        | 66                   | -2            | 168           |
| EUR    | NAM        | 61              | 36           | 58%        | 61            | 20           | 33%        | 61             | 6            | 10%        | 63                   | -81           | 239           |
|        | <b>ERU</b> | <b>919</b>      | <b>727</b>   | <b>79%</b> | <b>919</b>    | <b>308</b>   | <b>34%</b> | <b>919</b>     | <b>111</b>   | <b>12%</b> | <b>929</b>           | <b>-73</b>    | <b>2,440</b>  |
|        | SAS        | -68             | 728          | 1065%      | -68           | -23          | 33%        | -68            | -10          | 14%        | -80                  | -875          | 668           |
|        | EAS        | 471             | 309          | 66%        | 471           | 157          | 33%        | 471            | 40           | 9%         | 492                  | -1,052        | 2,260         |
|        | MDE        | 45              | 11           | 25%        | 45            | 15           | 33%        | 45             | 8            | 18%        | 45                   | 6             | 107           |
|        | RBU        | 107             | 31           | 29%        | 107           | 36           | 33%        | 107            | 13           | 12%        | 108                  | 7             | 253           |
| SAS    | NAM        | 36              | 18           | 49%        | 36            | 12           | 33%        | 36             | 4            | 10%        | 37                   | -39           | 133           |
|        | ERU        | 50              | 28           | 56%        | 50            | 17           | 33%        | 50             | 6            | 12%        | 51                   | -31           | 157           |
|        | <b>SAS</b> | <b>18,864</b>   | <b>5,202</b> | <b>28%</b> | <b>18,864</b> | <b>6,378</b> | <b>34%</b> | <b>18,864</b>  | <b>2,968</b> | <b>16%</b> | <b>19,013</b>        | <b>4,000</b>  | <b>42,201</b> |
|        | EAS        | 408             | 215          | 53%        | 408           | 136          | 33%        | 408            | 34           | 8%         | 416                  | -339          | 1,373         |
|        | MDE        | 15              | 6            | 39%        | 15            | 5            | 33%        | 15             | 3            | 19%        | 15                   | 0             | 41            |
|        | RBU        | 13              | 9            | 68%        | 13            | 4            | 33%        | 13             | 2            | 12%        | 13                   | -7            | 40            |
| EAS    | NAM        | 228             | 121          | 53%        | 228           | 76           | 33%        | 228            | 23           | 10%        | 230                  | -51           | 629           |
|        | ERU        | 311             | 163          | 52%        | 311           | 104          | 33%        | 311            | 36           | 12%        | 314                  | -54           | 848           |
|        | SAS        | 423             | 828          | 196%       | 423           | 141          | 33%        | 423            | 68           | 16%        | 449                  | -1,249        | 2,381         |
|        | <b>EAS</b> | <b>9,609</b>    | <b>5,254</b> | <b>55%</b> | <b>9,609</b>  | <b>3,241</b> | <b>34%</b> | <b>9,609</b>   | <b>813</b>   | <b>8%</b>  | <b>9,696</b>         | <b>-2,015</b> | <b>26,364</b> |
|        | MDE        | 33              | 15           | 45%        | 33            | 11           | 33%        | 33             | 6            | 18%        | 34                   | -3            | 95            |
|        | RBU        | 84              | 38           | 46%        | 84            | 28           | 33%        | 84             | 10           | 12%        | 84                   | -10           | 225           |
| MDE    | NAM        | 34              | 19           | 56%        | 34            | 11           | 33%        | 34             | 3            | 10%        | 34                   | -33           | 121           |
|        | ERU        | 55              | 17           | 31%        | 55            | 18           | 33%        | 55             | 7            | 13%        | 57                   | -45           | 187           |
|        | SAS        | 304             | 845          | 278%       | 304           | 102          | 33%        | 304            | 50           | 16%        | 310                  | -89           | 911           |
|        | EAS        | 158             | 70           | 45%        | 158           | 53           | 33%        | 158            | 14           | 9%         | 160                  | -117          | 520           |
|        | <b>MDE</b> | <b>172</b>      | <b>97</b>    | <b>57%</b> | <b>172</b>    | <b>58</b>    | <b>34%</b> | <b>172</b>     | <b>31</b>    | <b>18%</b> | <b>176</b>           | <b>-6</b>     | <b>479</b>    |
|        | RBU        | 30              | 4            | 13%        | 30            | 10           | 33%        | 30             | 4            | 13%        | 30                   | 1             | 74            |
| RBU    | NAM        | 41              | 34           | 82%        | 41            | 14           | 33%        | 41             | 4            | 10%        | 42                   | -60           | 166           |
|        | ERU        | 152             | 69           | 46%        | 152           | 51           | 33%        | 152            | 19           | 12%        | 154                  | -45           | 440           |
|        | SAS        | -178            | 850          | 478%       | -178          | -59          | 33%        | -178           | -28          | 16%        | -199                 | -1,707        | 1,175         |
|        | EAS        | 407             | 332          | 82%        | 407           | 136          | 33%        | 407            | 35           | 9%         | 420                  | -622          | 1,660         |
|        | MDE        | 16              | 12           | 73%        | 16            | 5            | 33%        | 16             | 3            | 17%        | 17                   | -12           | 56            |
|        | <b>RBU</b> | <b>139</b>      | <b>129</b>   | <b>93%</b> | <b>139</b>    | <b>47</b>    | <b>34%</b> | <b>139</b>     | <b>17</b>    | <b>12%</b> | <b>141</b>           | <b>-63</b>    | <b>422</b>    |

Table S12 PM<sub>2.5</sub>-related deaths in regional reduction scenarios, including the deterministic means, results from the Monte Carlo analysis, and analysis of uncertainty showing the standard deviation and coefficient of variation (%) due to uncertainties from the spread of individual model results, the relative risks (RRs), and baseline mortality rates.

| source | Receptor   | Spread of model |               |             | RRs           |              |            | Baseline Mortality |              |            | Monte-Carlo analysis |               |                |
|--------|------------|-----------------|---------------|-------------|---------------|--------------|------------|--------------------|--------------|------------|----------------------|---------------|----------------|
|        |            | mean            | stdev         | Cv          | mean          | stdev        | CV         | mean               | stdev        | CV         | mean                 | 2.5%          | 97.5%          |
| NAM    | <b>NAM</b> | <b>17,686</b>   | <b>7,015</b>  | <b>40%</b>  | <b>17,686</b> | <b>3,071</b> | <b>17%</b> | <b>17,686</b>      | <b>1,819</b> | <b>10%</b> | <b>17,988</b>        | <b>630</b>    | <b>28,310</b>  |
|        | ERU        | 629             | 711           | 113%        | 629           | 68           | 11%        | 629                | 60           | 9%         | 640                  | 82            | 1,076          |
|        | SAS        | -11             | 193           | 1682%       | -11           | 5            | 46%        | -11                | -1           | 6%         | 11                   | -207          | 82             |
|        | EAS        | 214             | 250           | 117%        | 214           | -2           | 1%         | 214                | 21           | 10%        | 196                  | -296          | 365            |
|        | MDE        | 9               | 52            | 579%        | 9             | 2            | 21%        | 9                  | 1            | 16%        | 8                    | -5            | 28             |
|        | RBU        | 298             | 387           | 130%        | 298           | 32           | 11%        | 298                | 16           | 5%         | 250                  | 89            | 420            |
| EUR    | NAM        | 62              | 34            | 55%         | 62            | 18           | 30%        | 62                 | 6            | 10%        | 62                   | 6             | 108            |
|        | <b>ERU</b> | <b>31,072</b>   | <b>19,747</b> | <b>64%</b>  | <b>31,072</b> | <b>4,560</b> | <b>15%</b> | <b>31,072</b>      | <b>2,785</b> | <b>9%</b>  | <b>31,924</b>        | <b>4,521</b>  | <b>53,853</b>  |
|        | SAS        | 123             | 140           | 113%        | 123           | 19           | 15%        | 123                | 22           | 18%        | 117                  | -57           | 188            |
|        | EAS        | 412             | 182           | 44%         | 412           | 20           | 5%         | 412                | 40           | 10%        | 389                  | -23           | 550            |
|        | MDE        | 537             | 448           | 83%         | 537           | -16          | 3%         | 537                | 68           | 13%        | 401                  | 27            | 1,363          |
|        | RBU        | 5,826           | 3,940         | 68%         | 5,826         | 476          | 8%         | 5,826              | 317          | 5%         | 5,743                | 681           | 8,033          |
| SAS    | NAM        | 46              | 65            | 142%        | 46            | 15           | 32%        | 46                 | 5            | 10%        | 46                   | -14           | 88             |
|        | ERU        | 109             | 111           | 102%        | 109           | 2            | 2%         | 109                | 10           | 10%        | 113                  | 14            | 196            |
|        | <b>SAS</b> | <b>50,435</b>   | <b>14,936</b> | <b>30%</b>  | <b>50,435</b> | <b>5,748</b> | <b>11%</b> | <b>50,435</b>      | <b>7,484</b> | <b>15%</b> | <b>47,923</b>        | <b>30,035</b> | <b>68,484</b>  |
|        | EAS        | 1,415           | 1,196         | 85%         | 1,415         | 147          | 10%        | 1,415              | 124          | 9%         | 1,394                | -71           | 2,045          |
|        | MDE        | 58              | 78            | 135%        | 58            | 9            | 15%        | 58                 | 11           | 20%        | 38                   | 2             | 148            |
|        | RBU        | 50              | 95            | 190%        | 50            | -8           | 15%        | 50                 | 2            | 5%         | 42                   | 8             | 108            |
| EAS    | NAM        | 338             | 179           | 53%         | 338           | 93           | 28%        | 338                | 35           | 10%        | 335                  | 35            | 505            |
|        | ERU        | 395             | 324           | 82%         | 395           | 46           | 12%        | 395                | 37           | 9%         | 394                  | 24            | 694            |
|        | SAS        | 903             | 870           | 96%         | 903           | 152          | 17%        | 903                | 136          | 15%        | 897                  | 589           | 1,355          |
|        | <b>EAS</b> | <b>98,495</b>   | <b>13,602</b> | <b>14%</b>  | <b>98,495</b> | <b>6,963</b> | <b>7%</b>  | <b>98,495</b>      | <b>8,770</b> | <b>9%</b>  | <b>91,114</b>        | <b>436</b>    | <b>128,649</b> |
|        | MDE        | 11              | 28            | 260%        | 11            | -1           | 7%         | 11                 | 1            | 12%        | 5                    | -1            | 25             |
|        | RBU        | 813             | 534           | 66%         | 813           | 135          | 17%        | 813                | 46           | 6%         | 803                  | 14            | 1,298          |
| MDE    | NAM        | 36              | 24            | 66%         | 36            | 12           | 34%        | 36                 | 4            | 10%        | 34                   | -1            | 57             |
|        | ERU        | 481             | 360           | 75%         | 481           | 6            | 1%         | 481                | 48           | 10%        | 419                  | 93            | 854            |
|        | SAS        | 1,400           | 709           | 51%         | 1,400         | 295          | 21%        | 1,400              | 234          | 17%        | 1,346                | 744           | 2,371          |
|        | EAS        | 169             | 646           | 383%        | 169           | -10          | 6%         | 169                | 16           | 10%        | 177                  | -612          | 455            |
|        | <b>MDE</b> | <b>2,538</b>    | <b>2,800</b>  | <b>110%</b> | <b>2,538</b>  | <b>22</b>    | <b>1%</b>  | <b>2,538</b>       | <b>336</b>   | <b>13%</b> | <b>1,599</b>         | <b>238</b>    | <b>4,535</b>   |
|        | RBU        | 813             | 842           | 104%        | 813           | 53           | 6%         | 813                | 53           | 7%         | 644                  | 31            | 1,605          |
| RBU    | NAM        | 46              | 39            | 86%         | 46            | 8            | 17%        | 46                 | 5            | 10%        | 41                   | 12            | 64             |
|        | ERU        | 2,196           | 1,099         | 50%         | 2,196         | 241          | 11%        | 2,196              | 174          | 8%         | 2,204                | 299           | 3,695          |
|        | SAS        | 13              | 507           | 3974%       | 13            | 31           | 247%       | 13                 | 8            | 66%        | 93                   | -216          | 192            |
|        | EAS        | 859             | 376           | 44%         | 859           | 61           | 7%         | 859                | 82           | 10%        | 814                  | 334           | 1,086          |
|        | MDE        | 106             | 111           | 104%        | 106           | 1            | 1%         | 106                | 13           | 12%        | 75                   | 9             | 222            |
|        | <b>RBU</b> | <b>18,001</b>   | <b>10,178</b> | <b>57%</b>  | <b>18,001</b> | <b>2,625</b> | <b>15%</b> | <b>18,001</b>      | <b>985</b>   | <b>5%</b>  | <b>17,640</b>        | <b>386</b>    | <b>25,674</b>  |

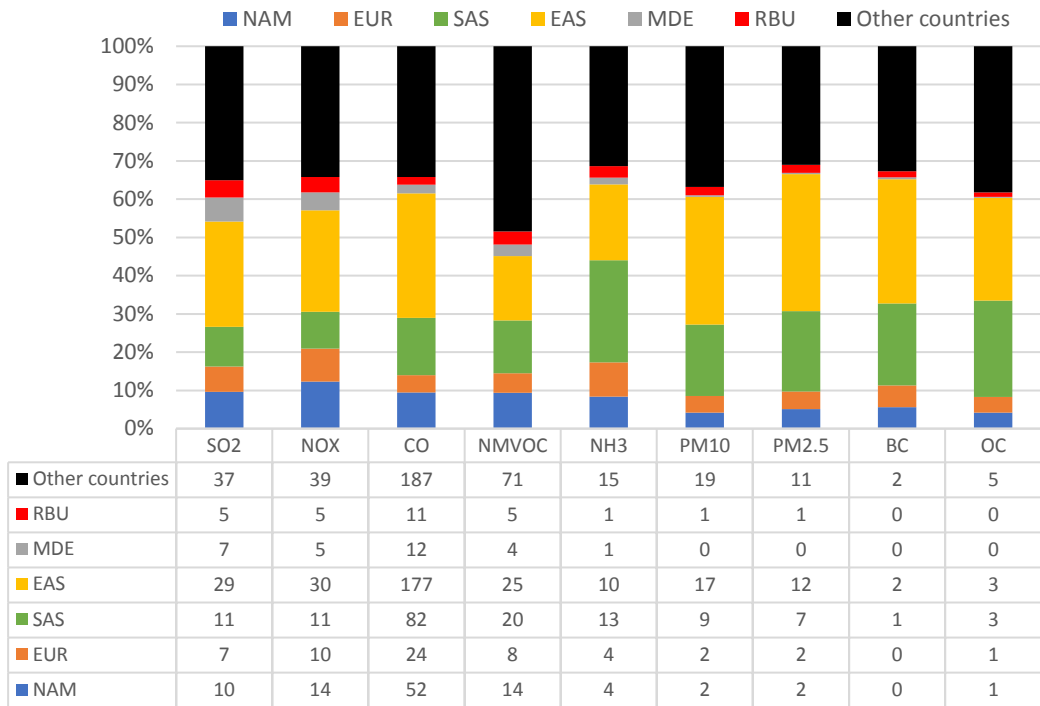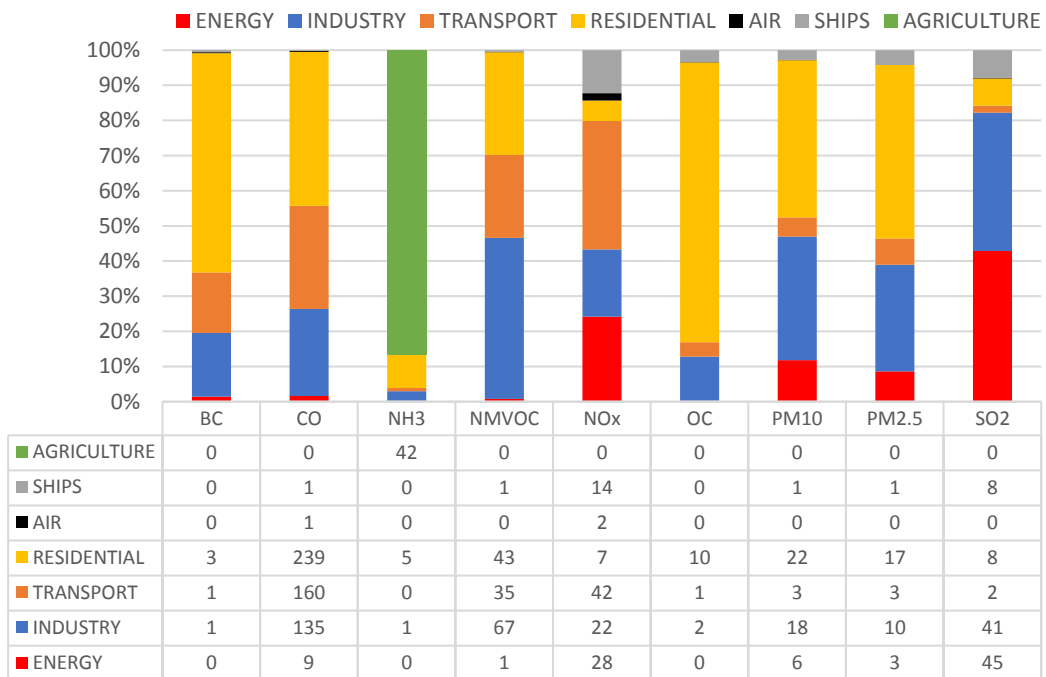

Figure S1. Regional (upper panel) and sectoral (lower panel) percent of total anthropogenic emissions of gaseous pollutants and particulate matter for the year 2010. Global absolute emissions are reported on bottom table in Tg species per year (Adapted from Janssens-Maenhout et al (2015)).

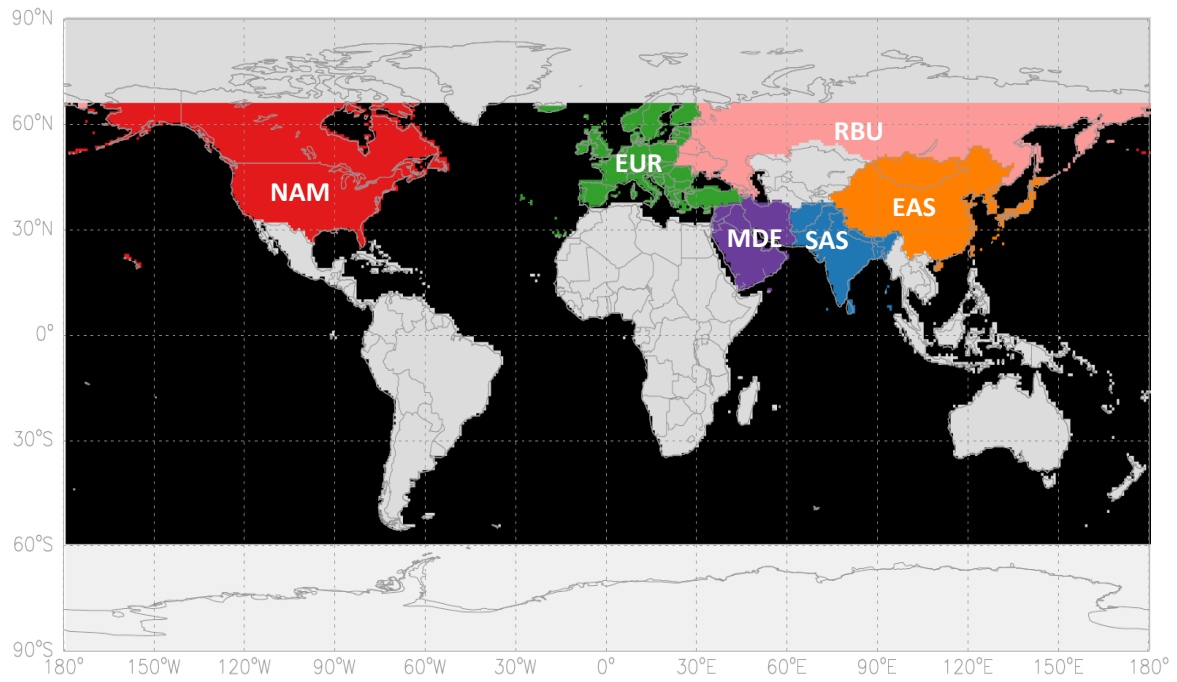

Figure S2. Six priority regions defined by TF-HTAP2 – NAM: North America, EUR: Europe, EAS: East Asia, SAS: South Asia, RBU; Russia/Belarus/Ukraine and MDE: Middle East.

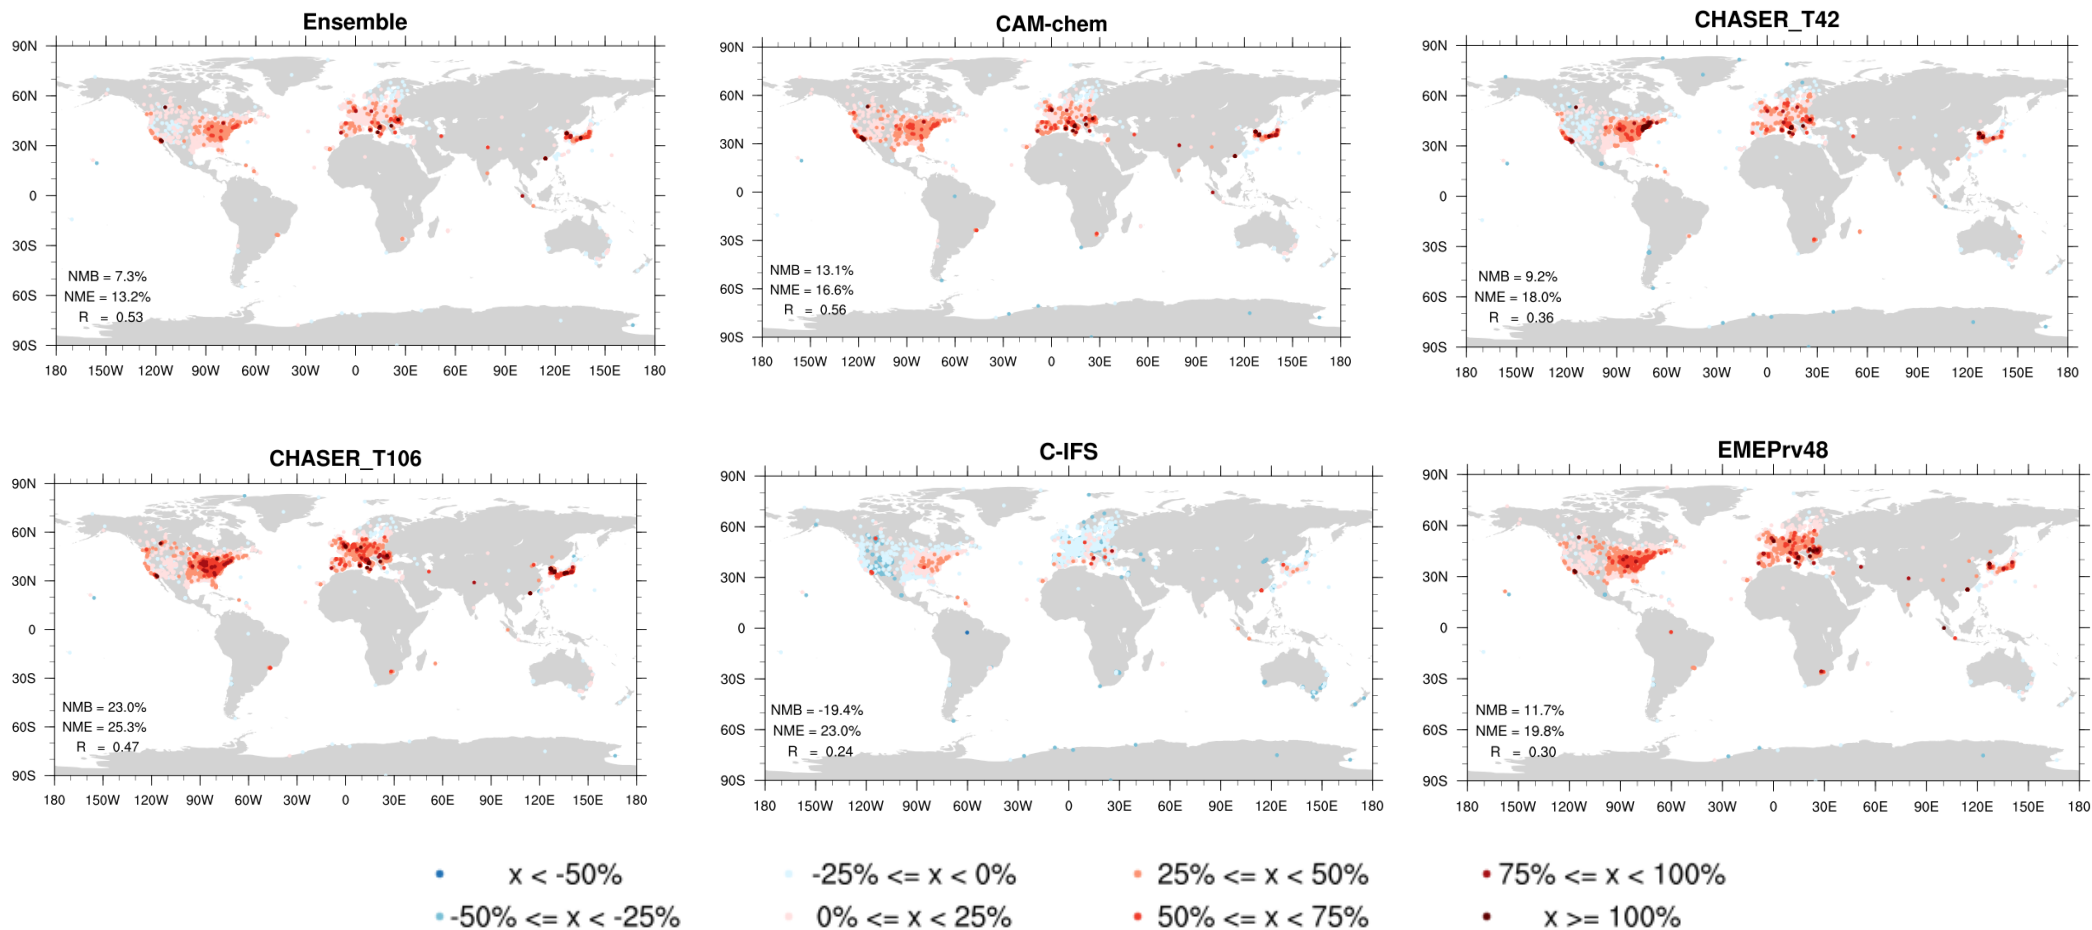

Figure S3. Spatial distributions of model performance for the maximum 3-month average of daily 1-hour maximum O<sub>3</sub> comparing TOAR observations with individual model simulations and the ensemble mean. The overall statistical parameters for each model are in the bottom left of each plot.



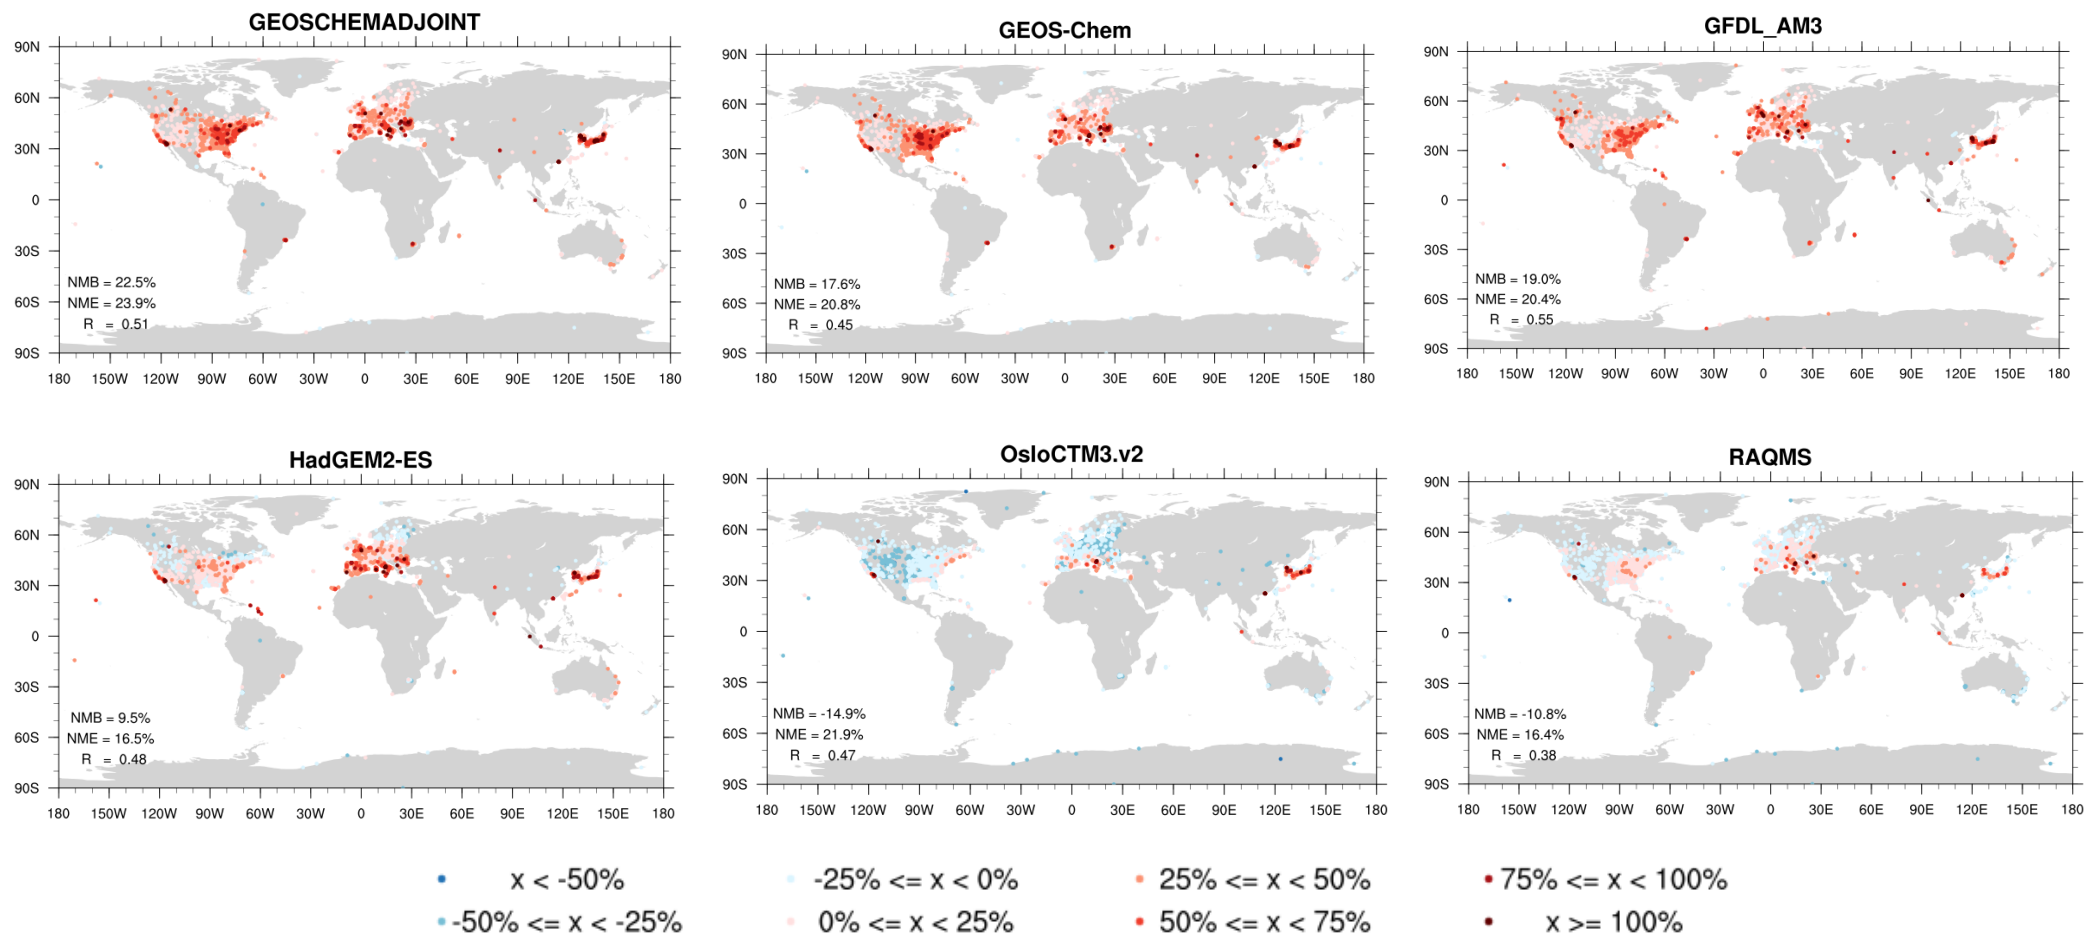

Figure S3. Continued.

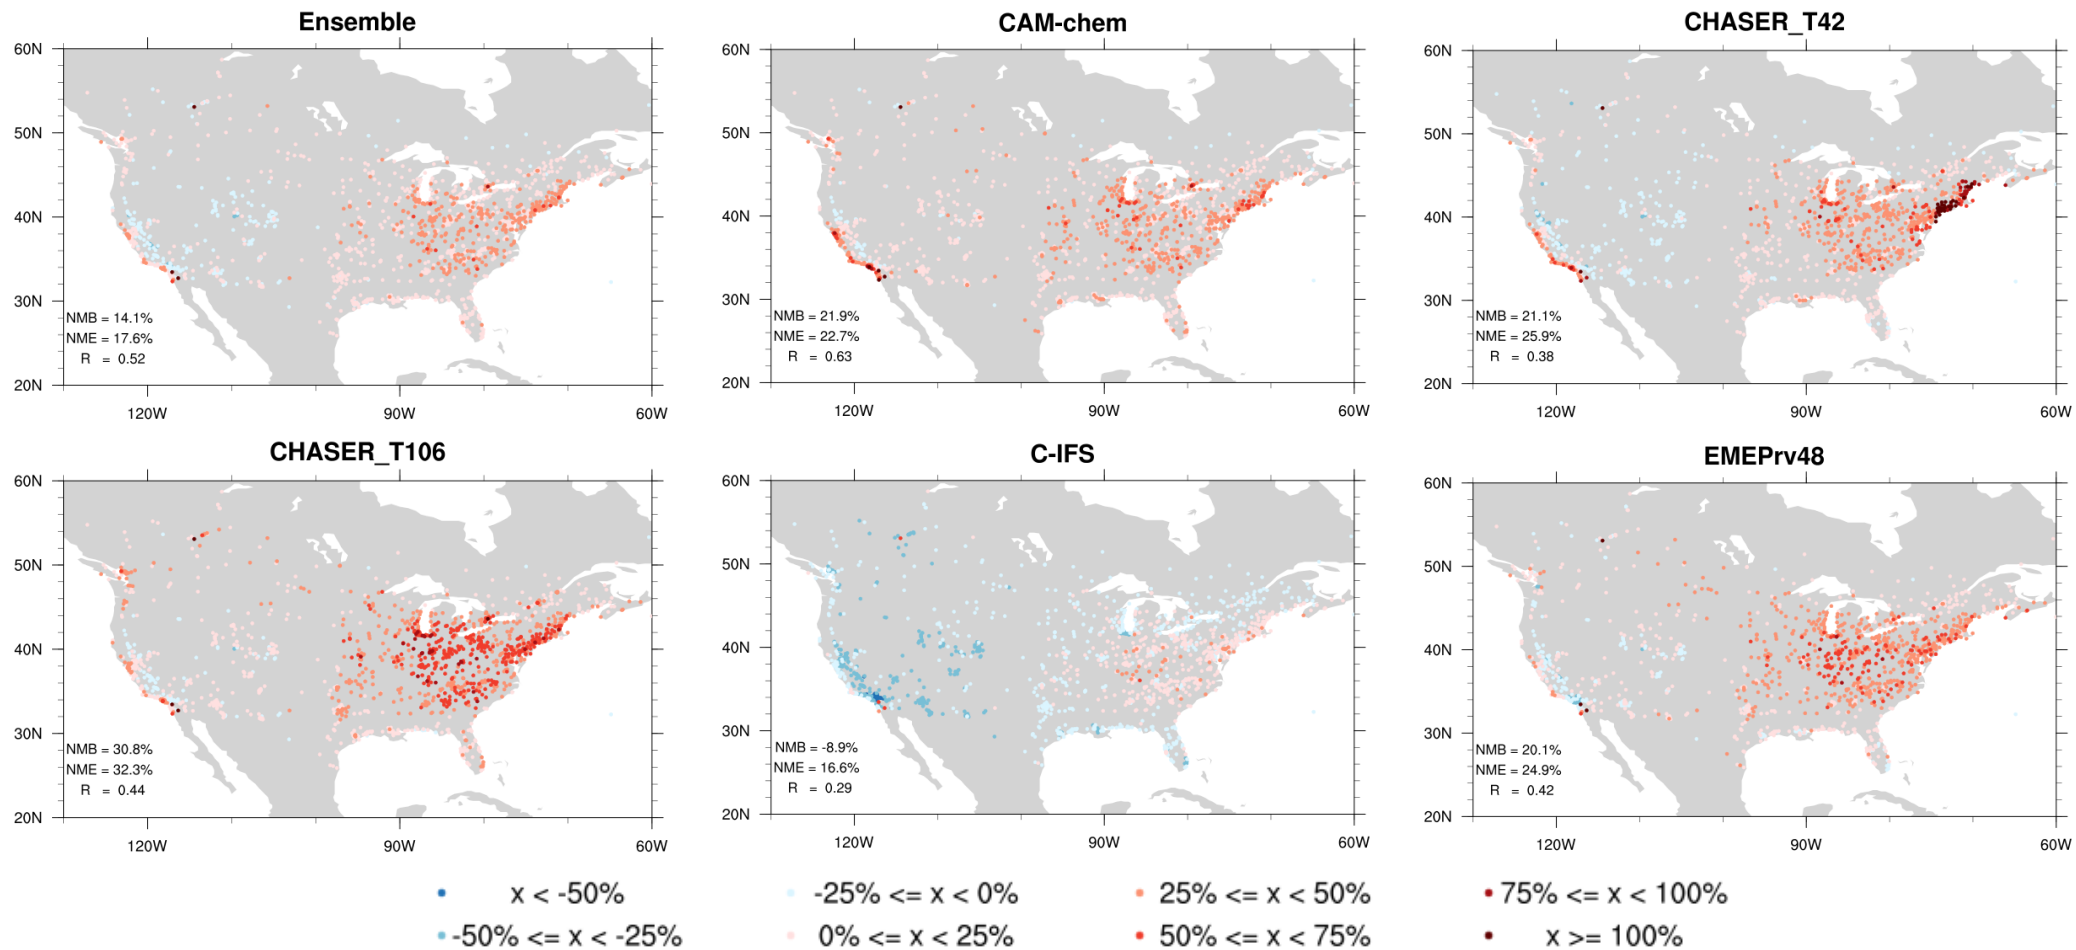

Figure S4. As Figure S3, but for North America.

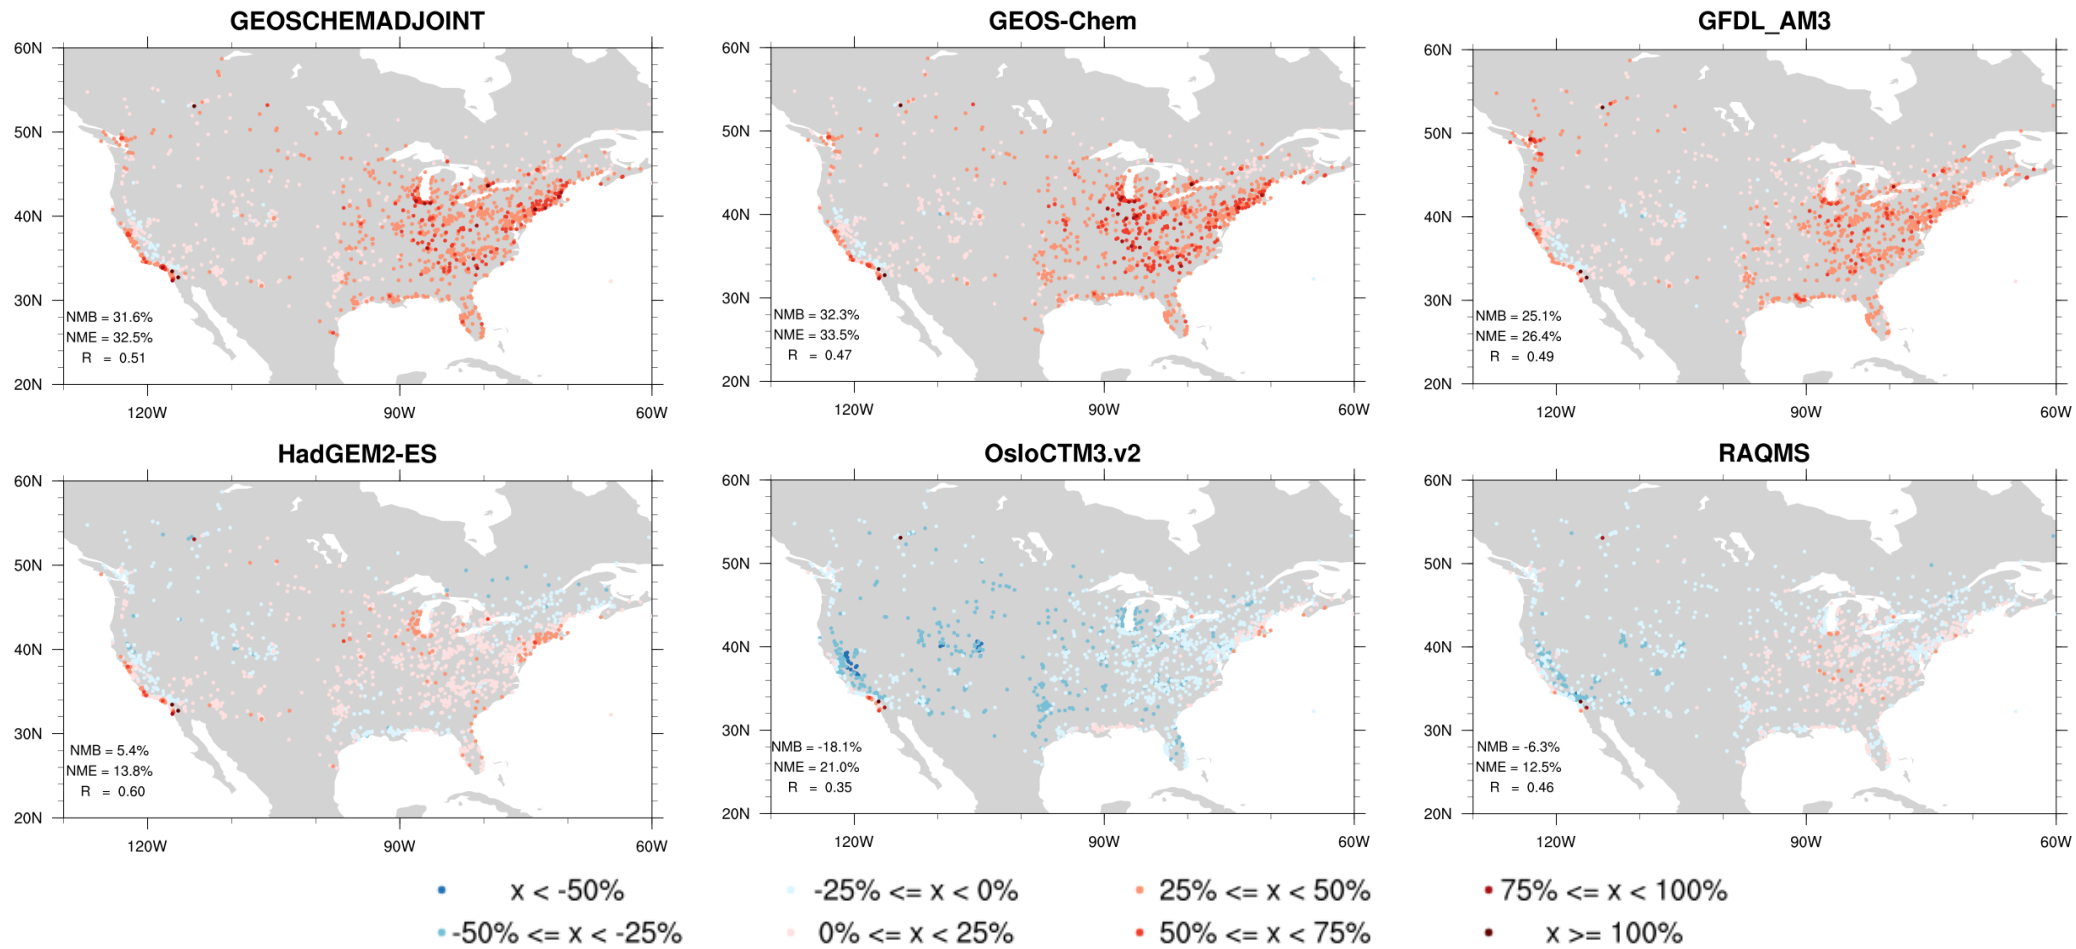

Figure S4. Continued.

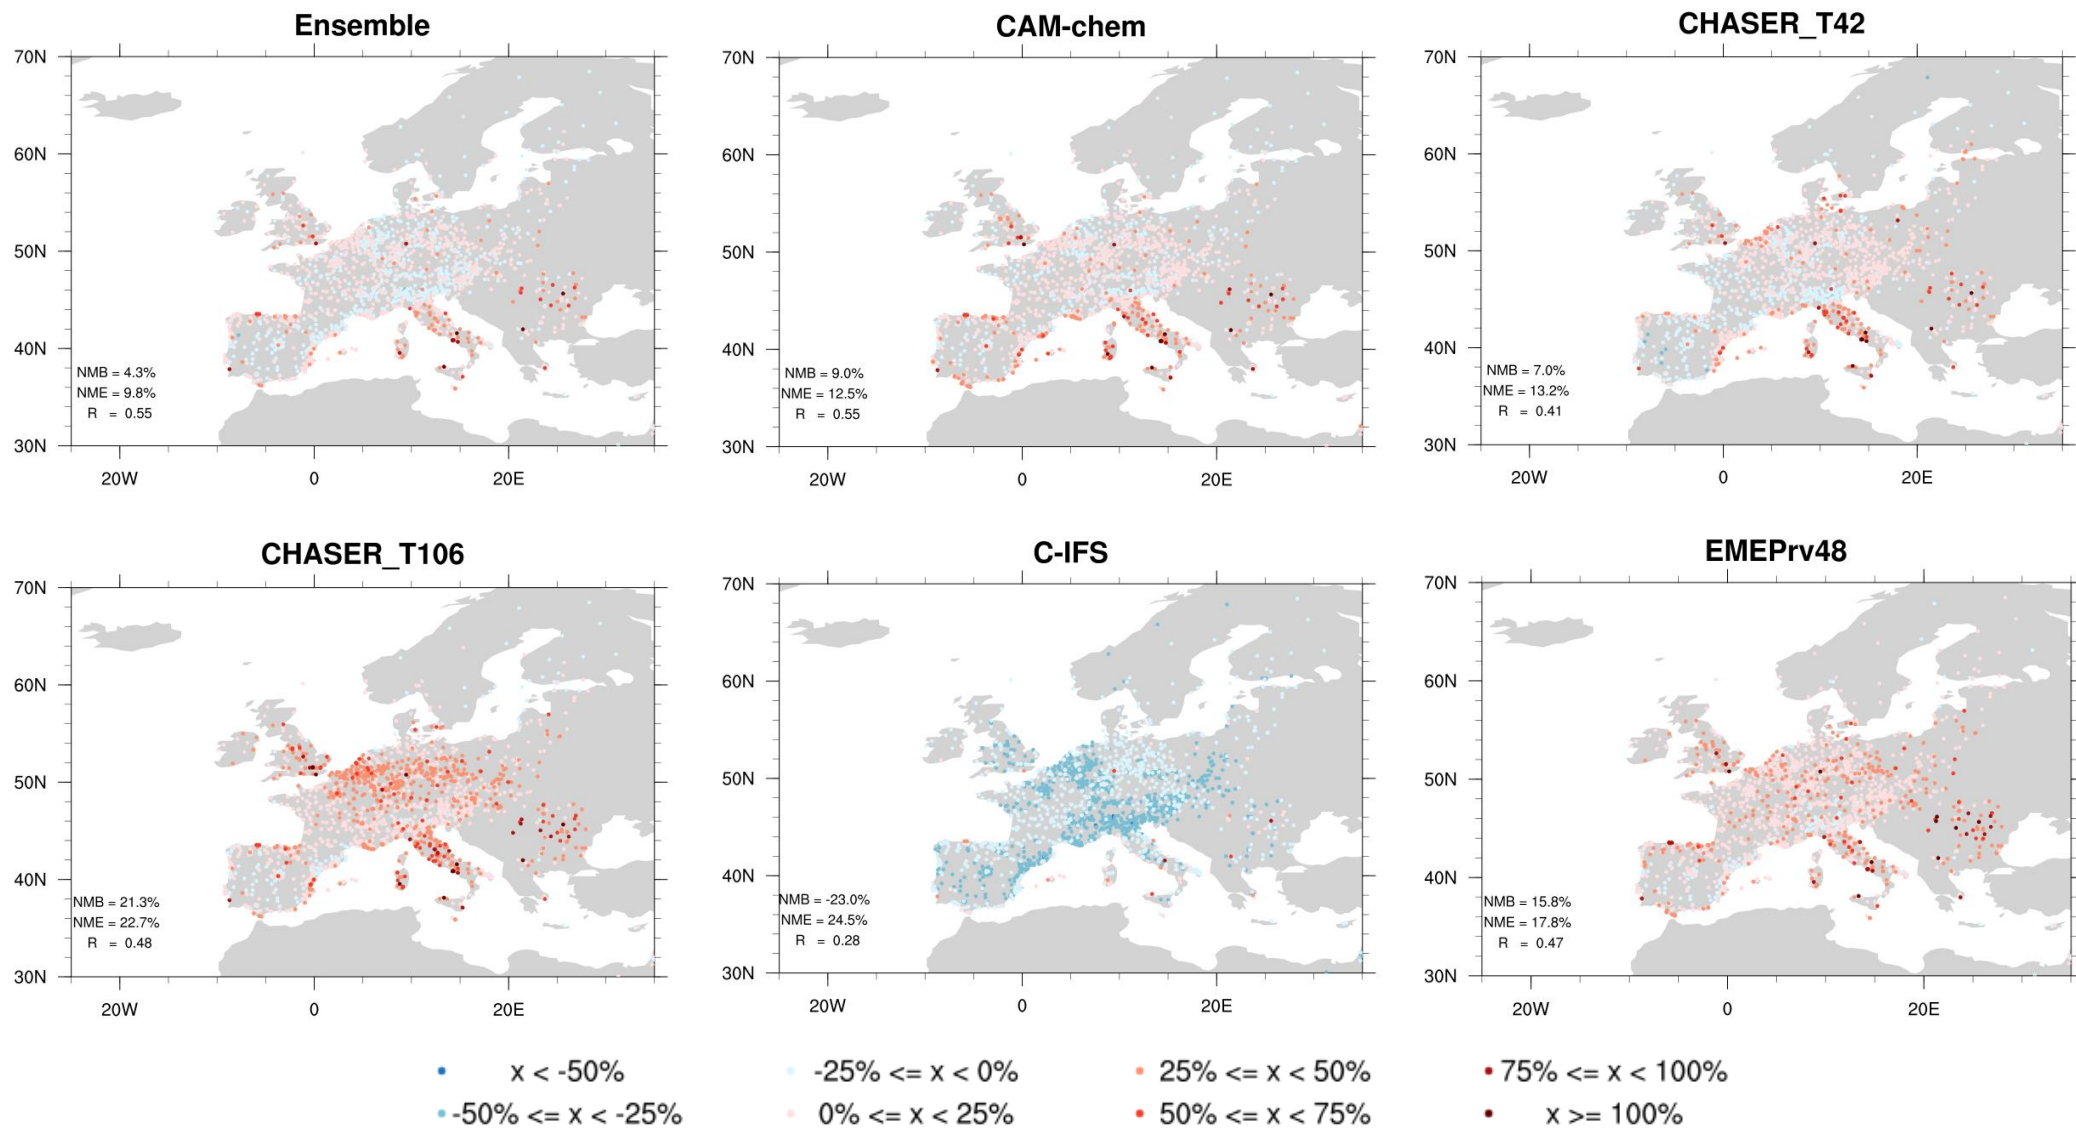

Figure S5. As Figure S3, but for Europe.

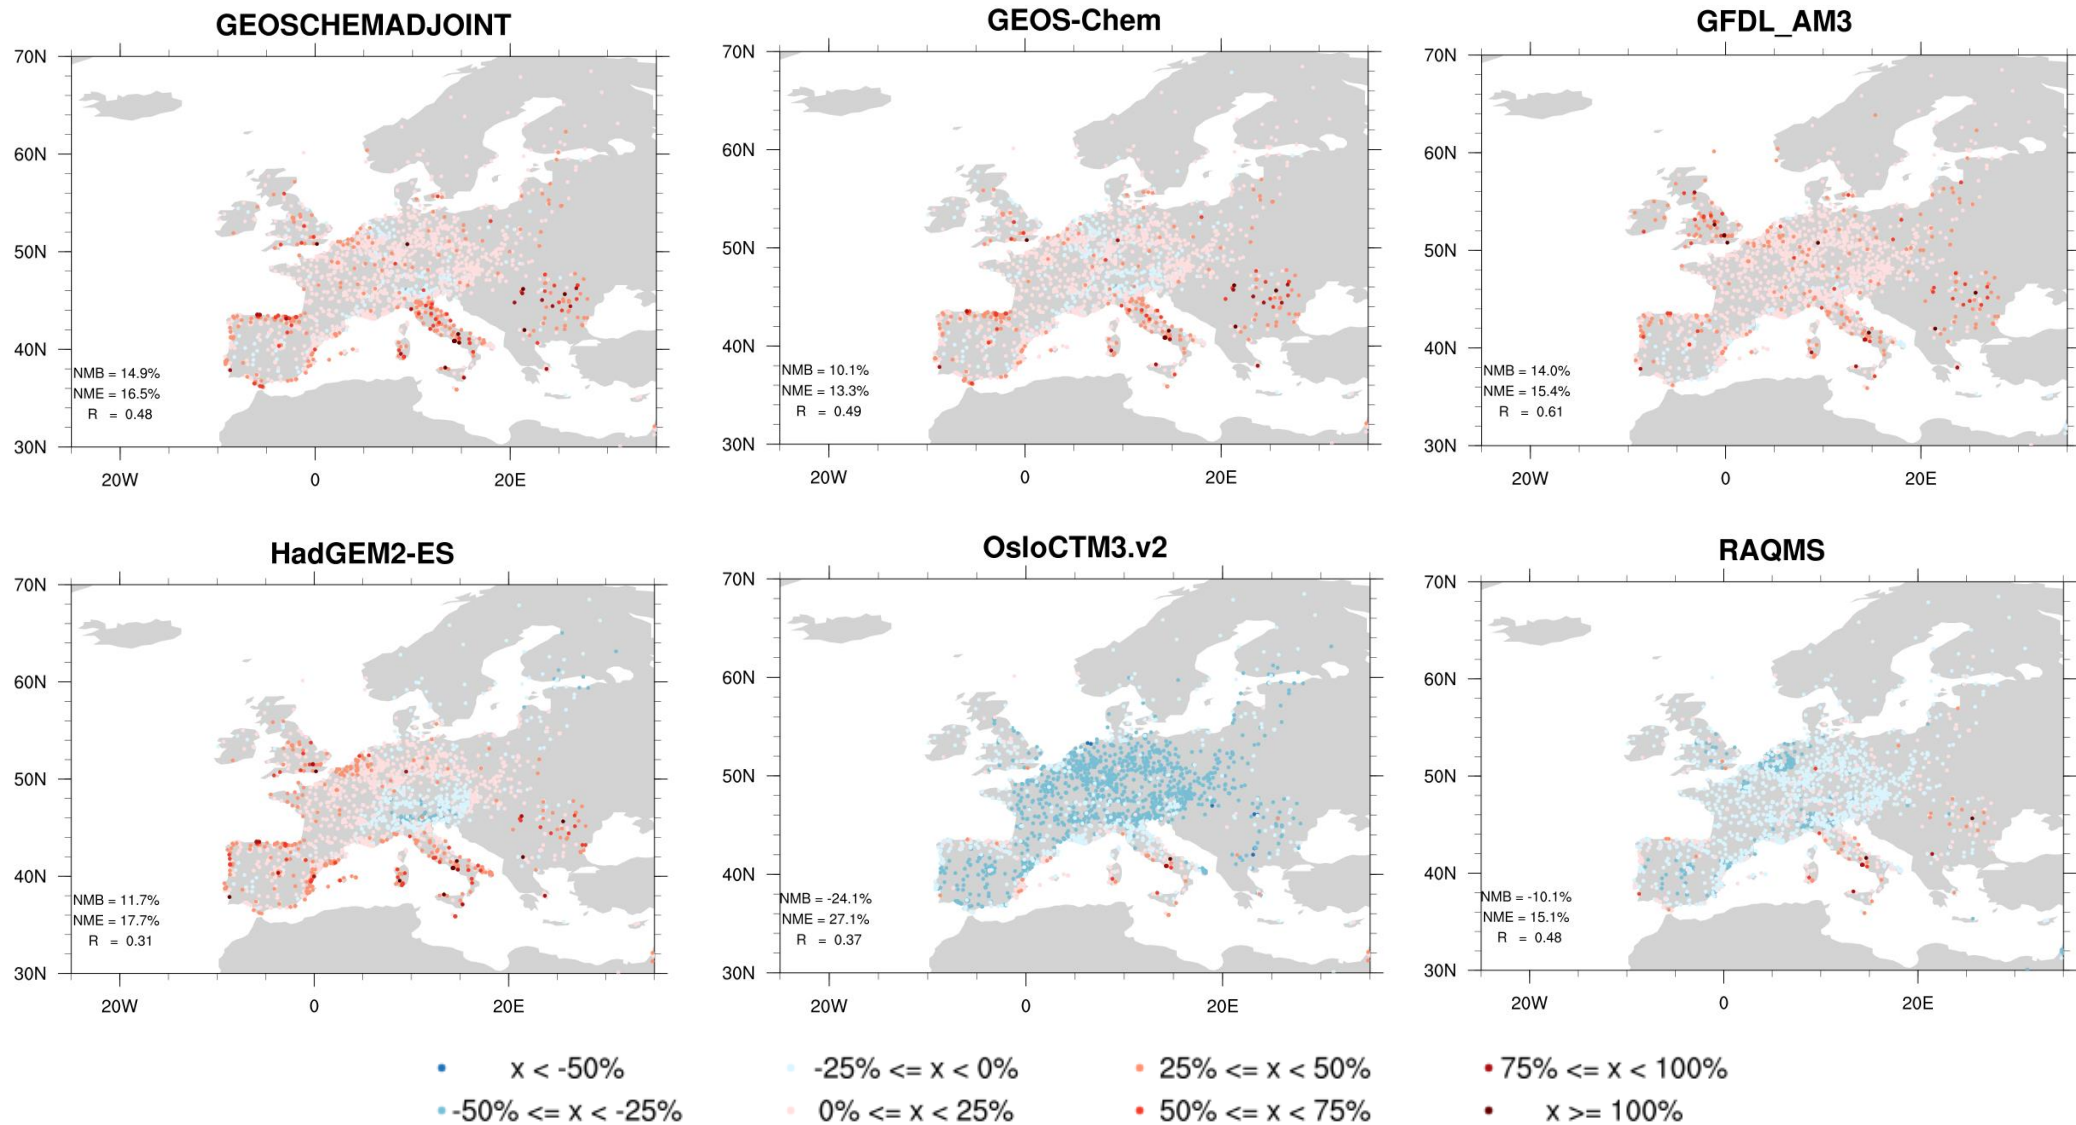

Figure S5. Continued.



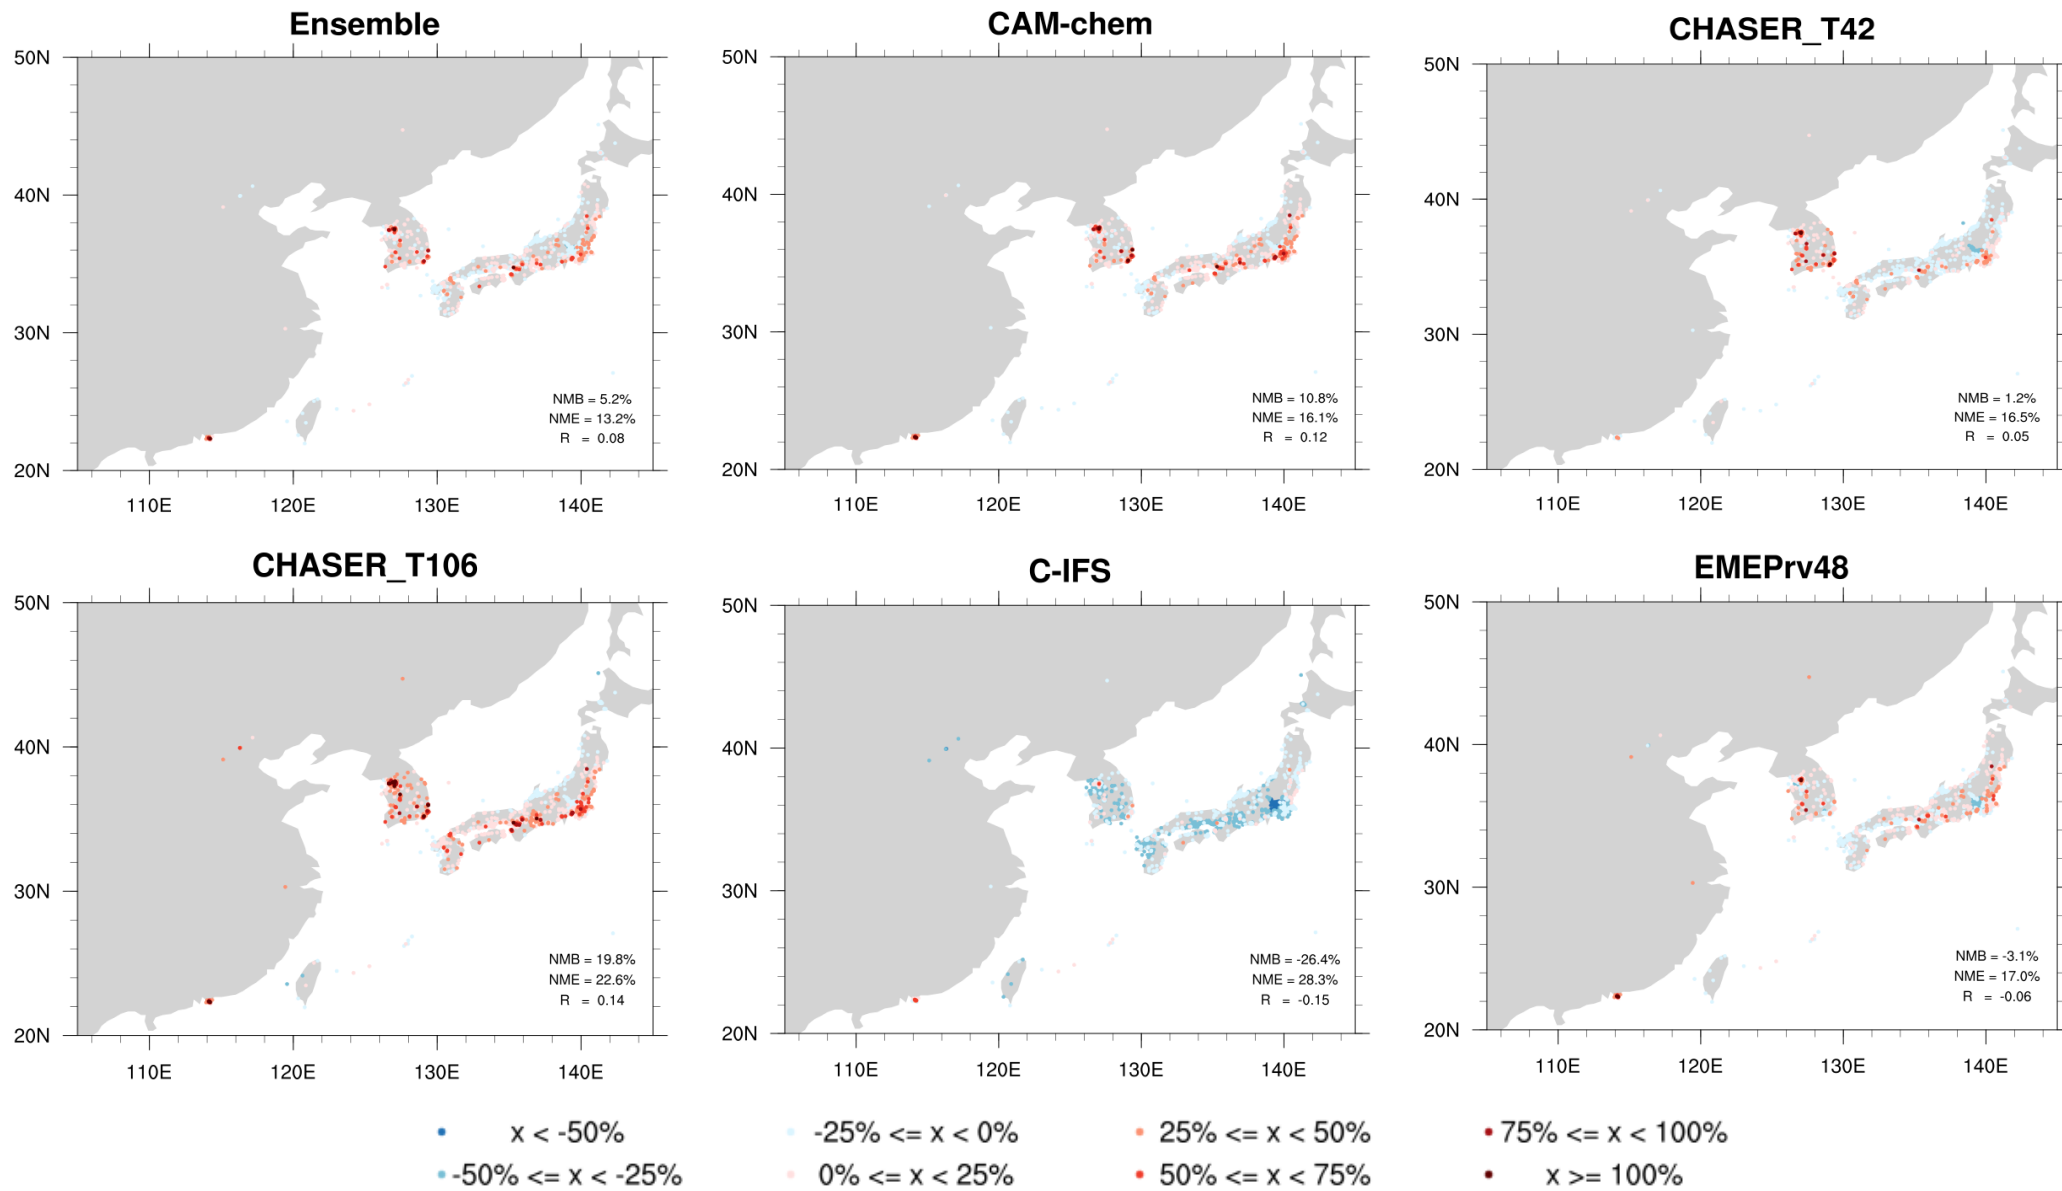

Figure S6. As Figure S3, but for East Asia.

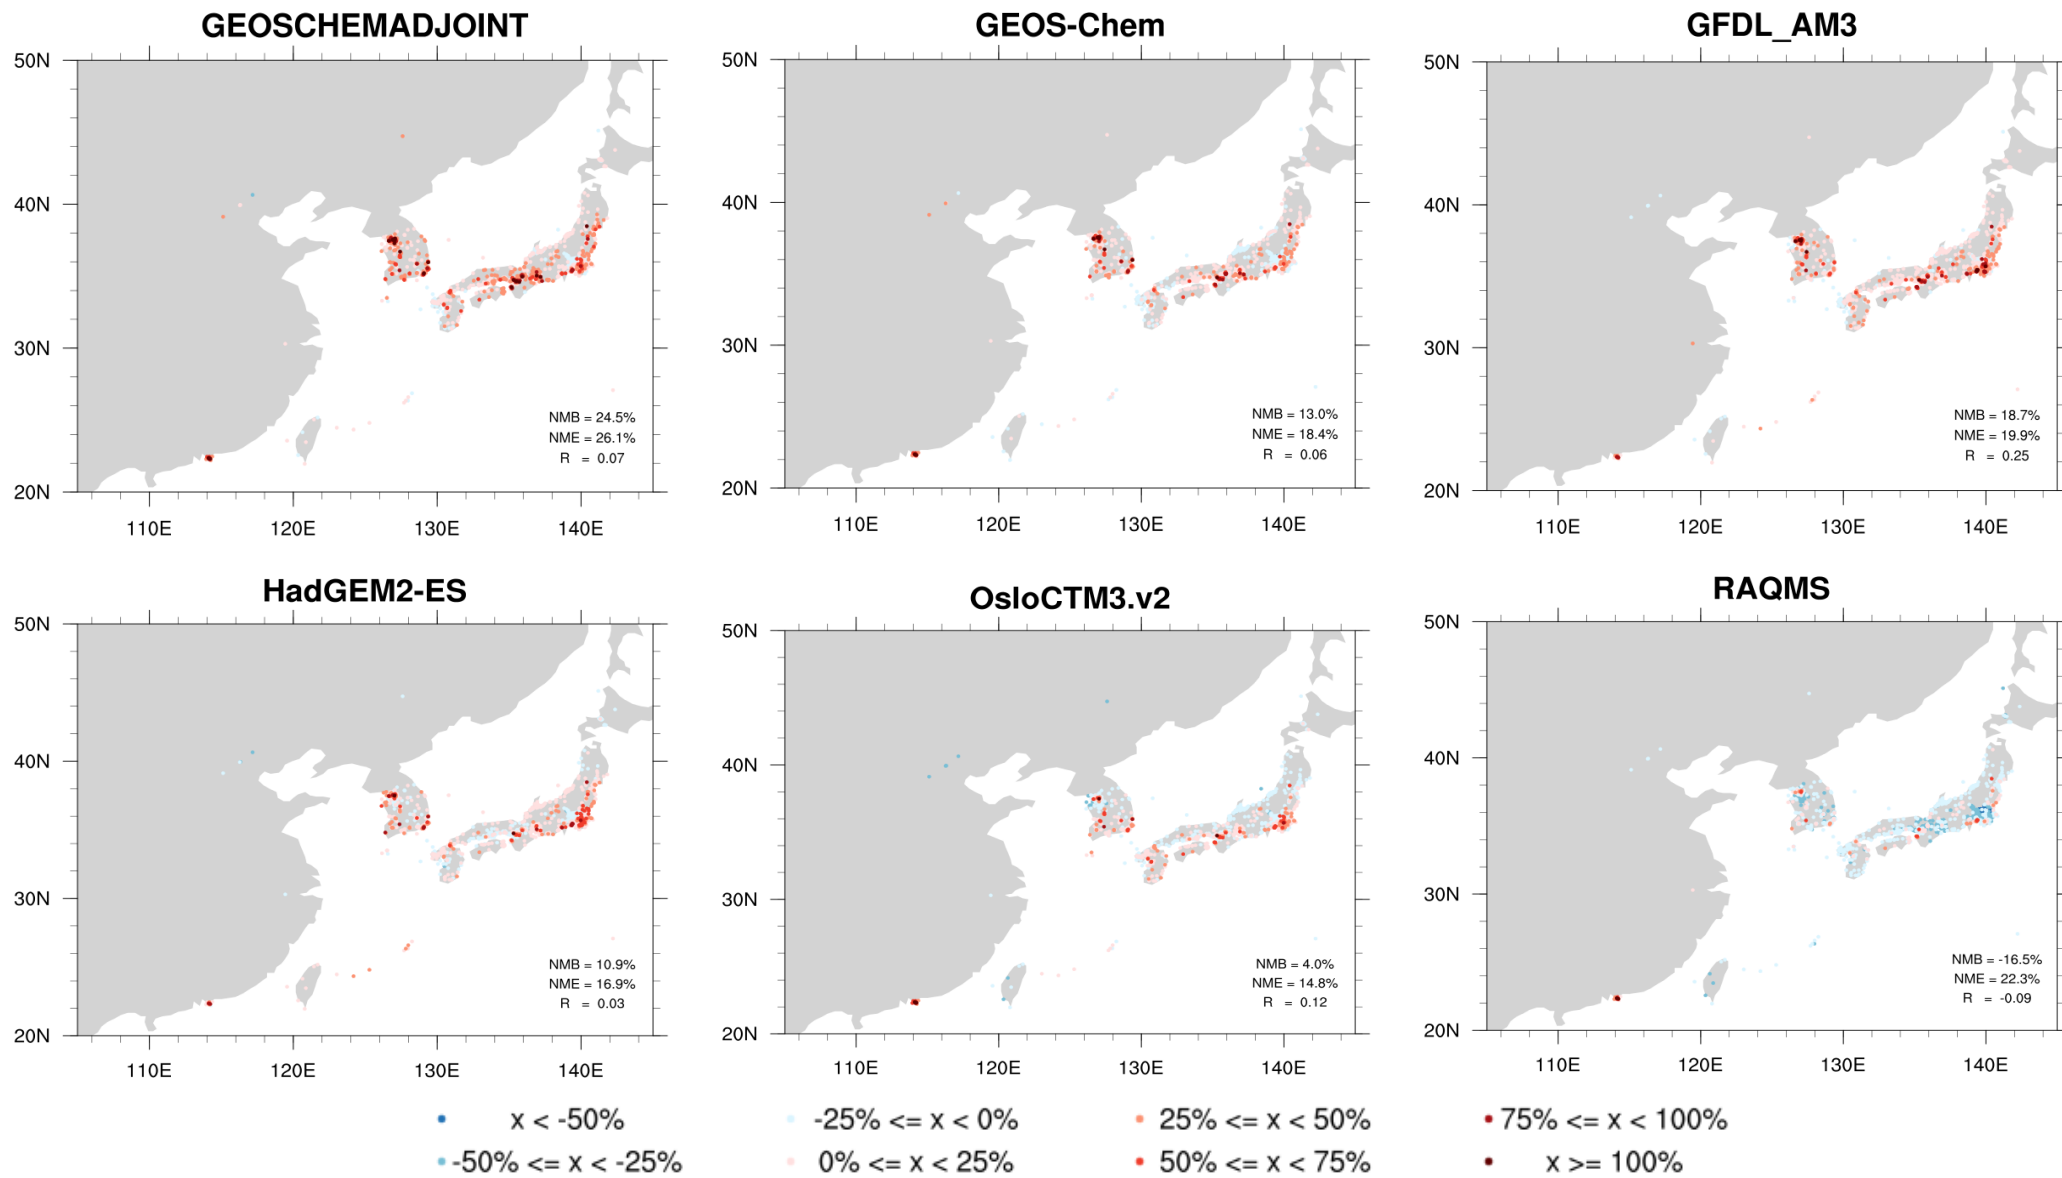

Figure S6. Continued.

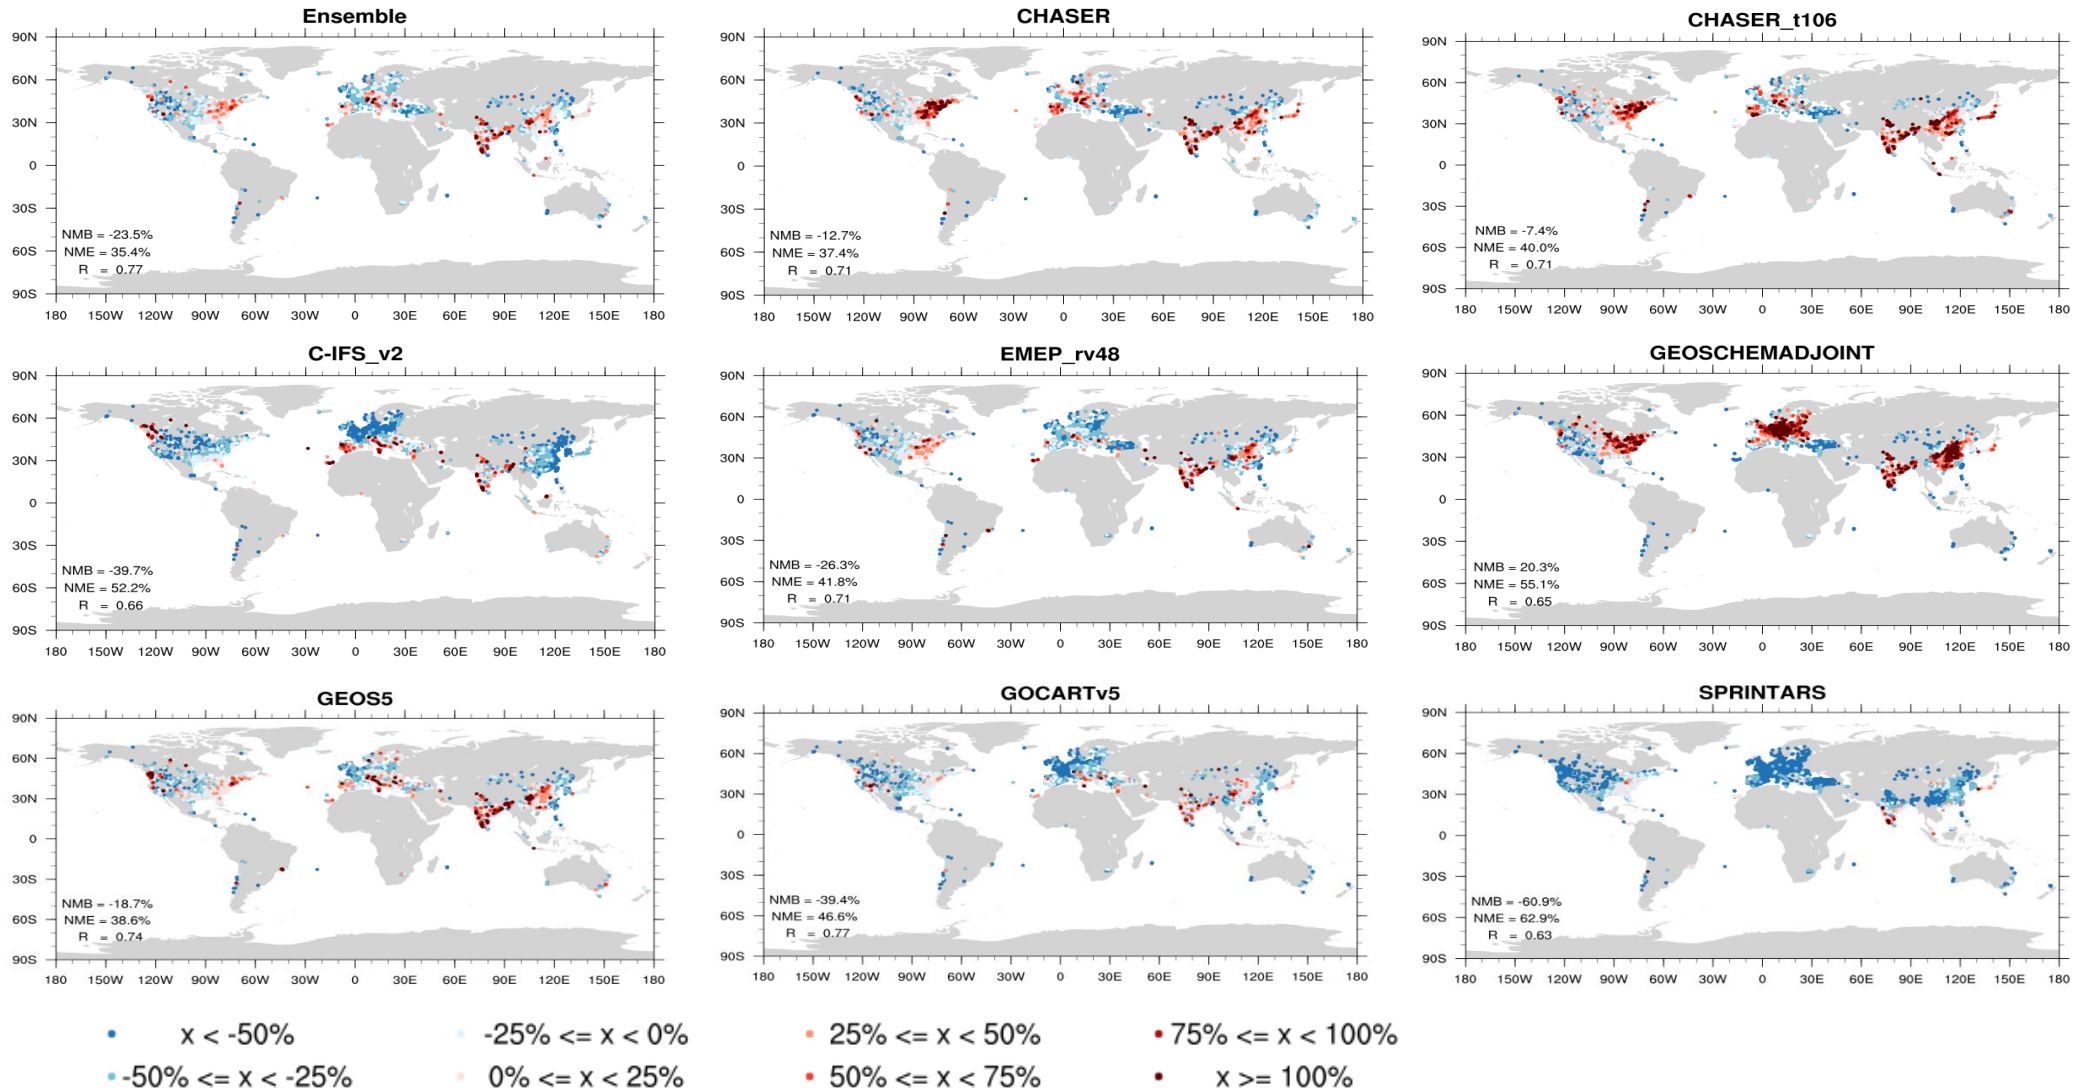

Figure S7. Spatial distributions of model performance for the annual average  $PM_{2.5}$ , comparing GBD2015 observations with individual model simulations and the ensemble mean. The overall statistical parameters for each model are in the bottom left of the plot.



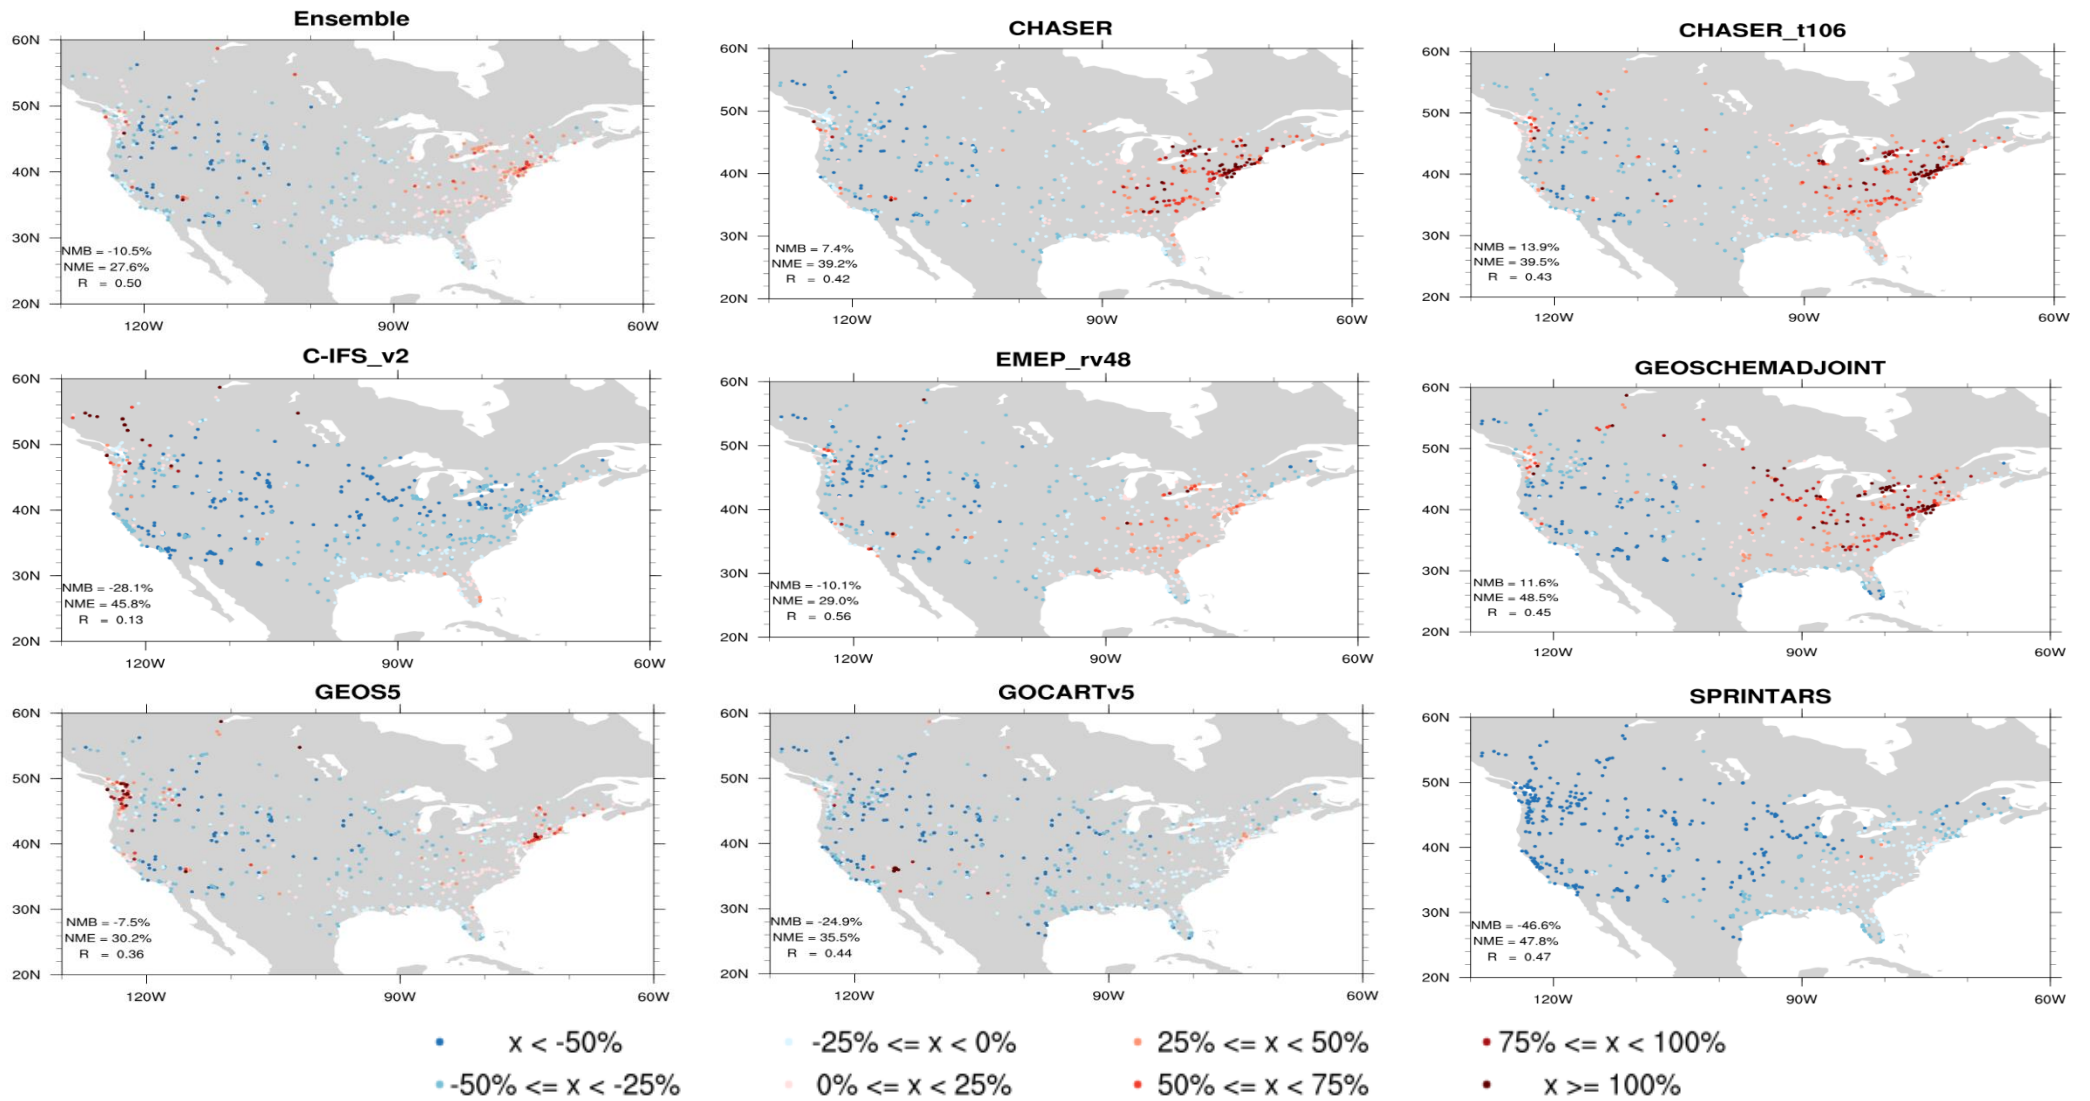

Figure S8. As Figure S7 but for NAM.

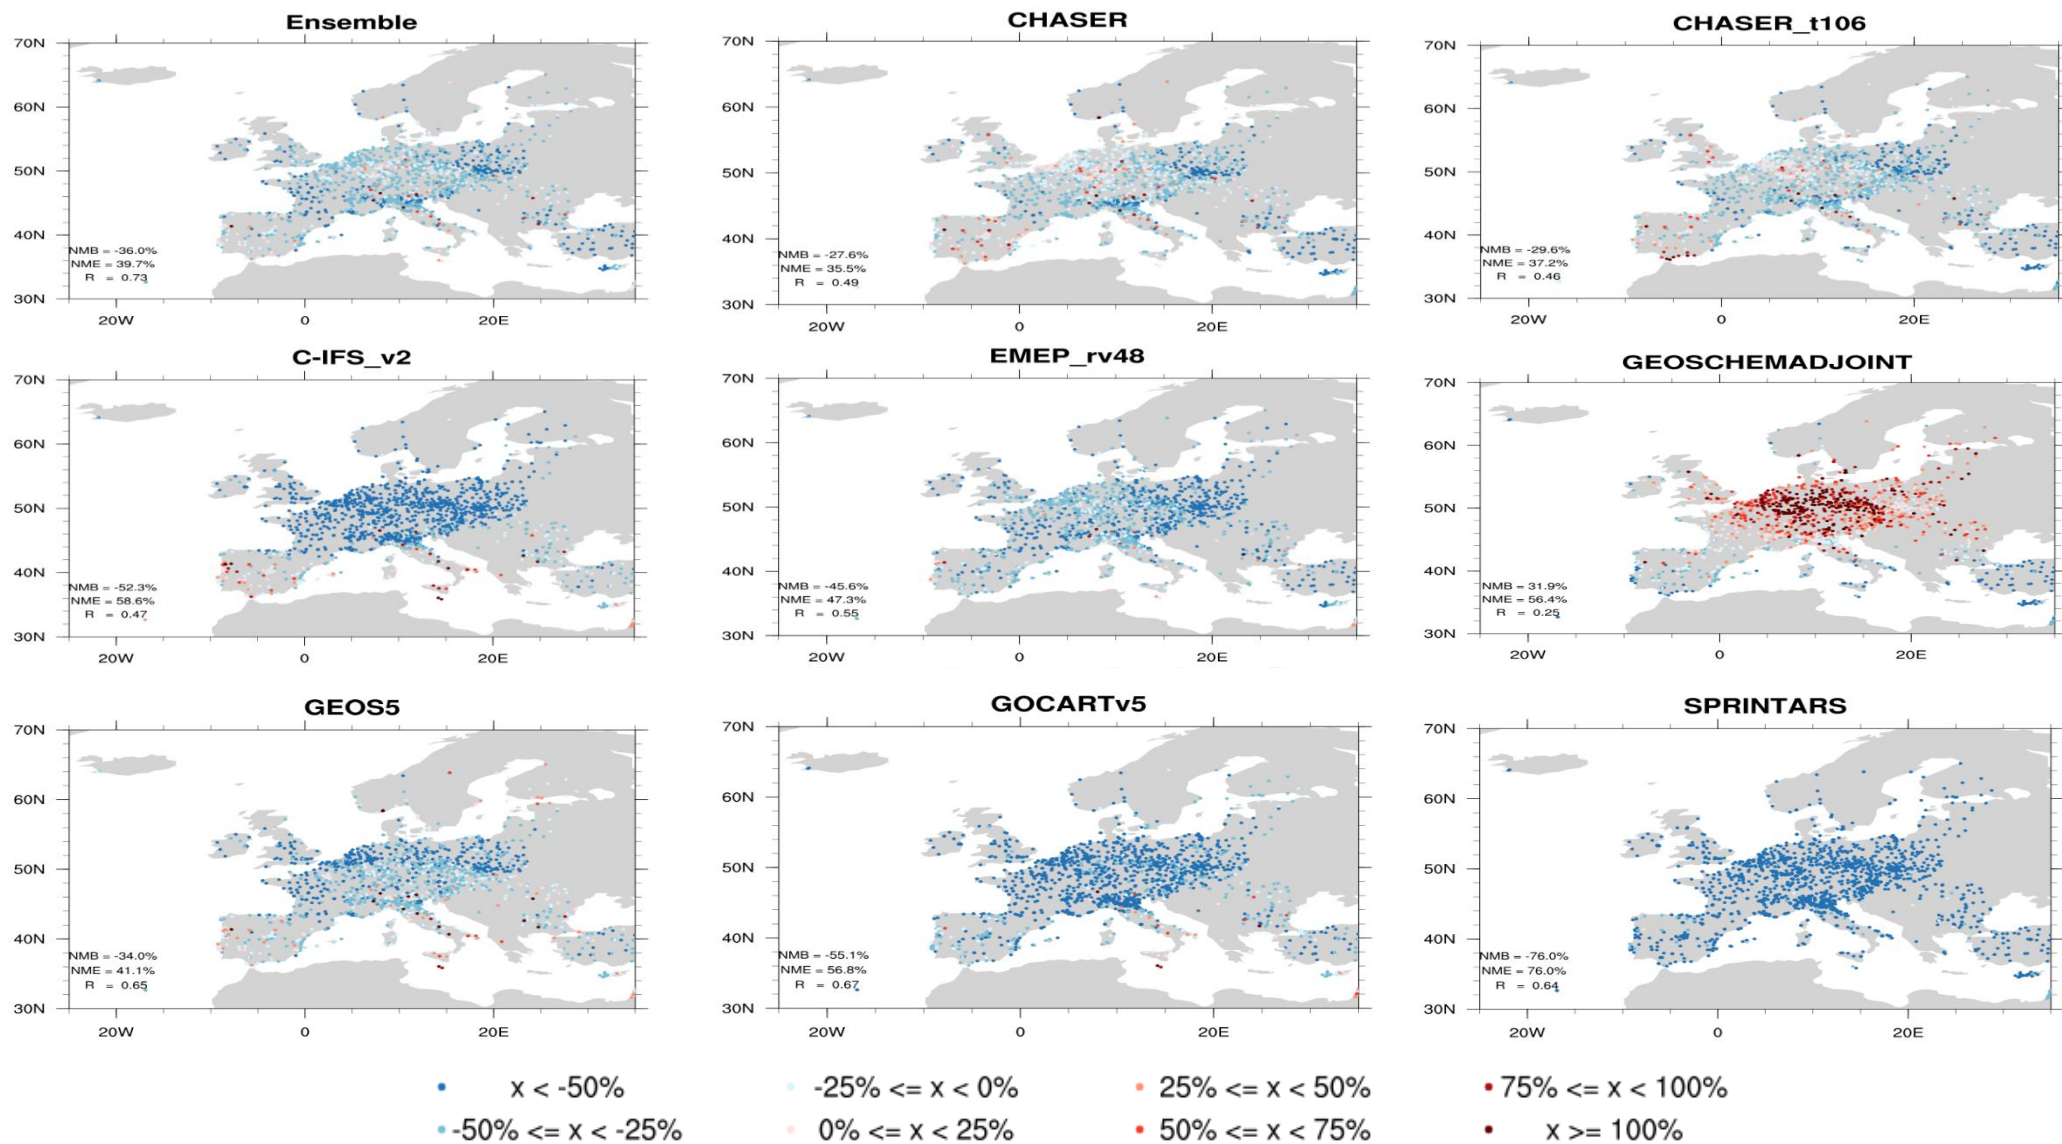

Figure S9. As figure S7, but for Europe.

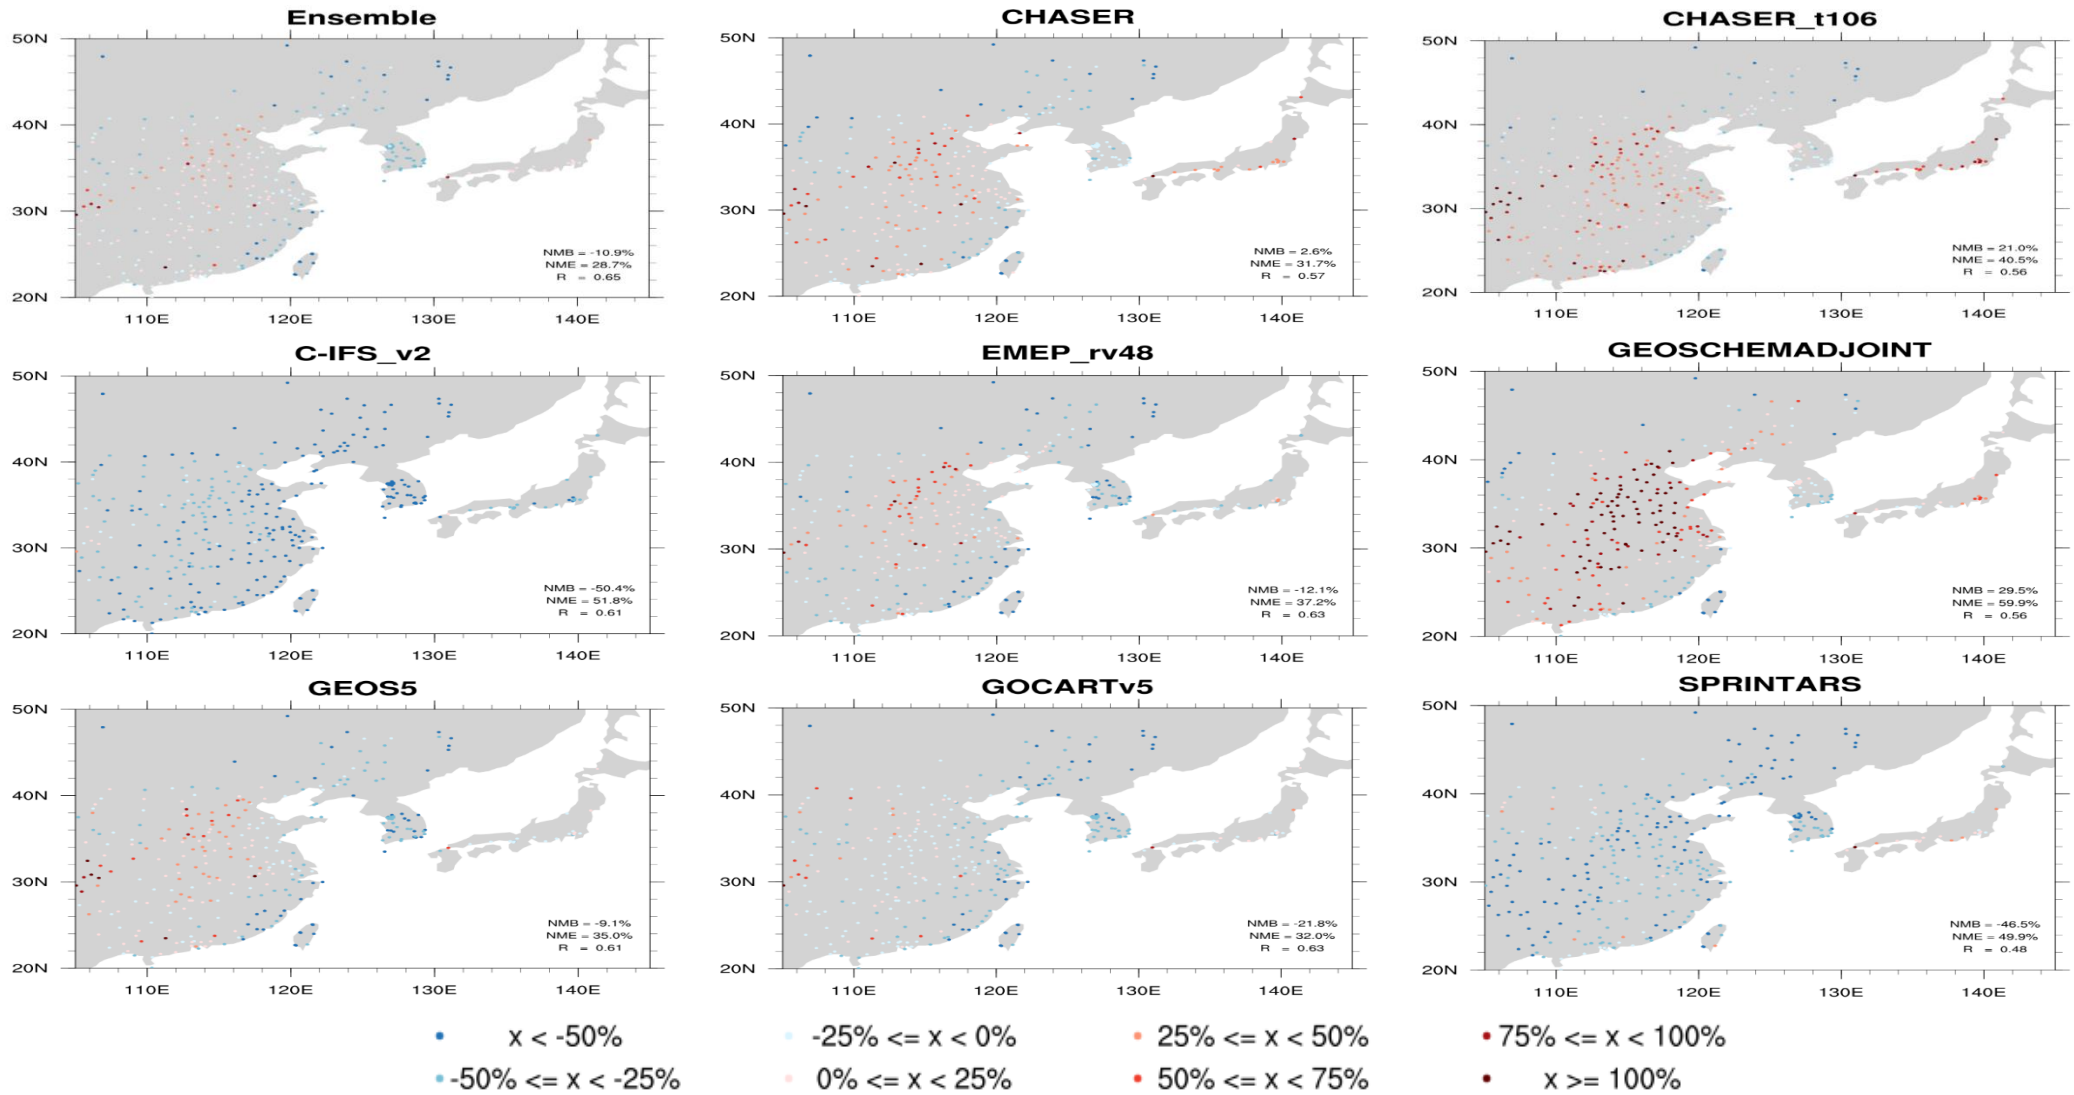

Figure S10. As Figure S7, but for East Asia.



(a) Population

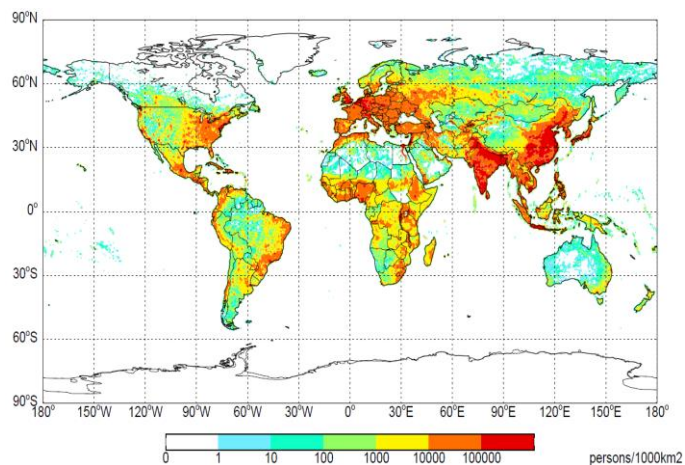

(d) Respiratory disease (RESP)

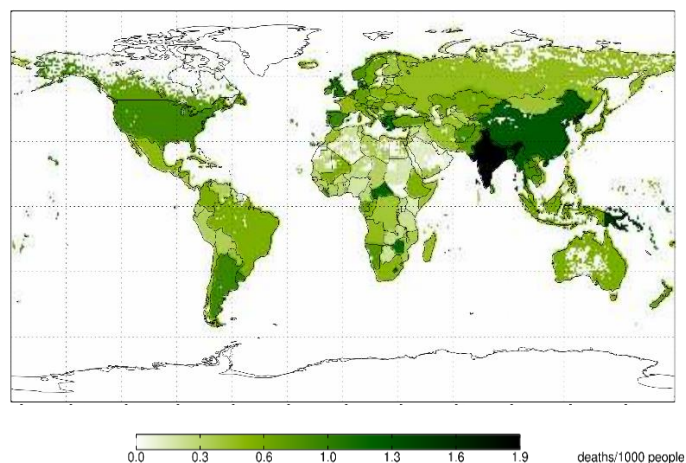

(b) Ischemic heart disease (IHD)

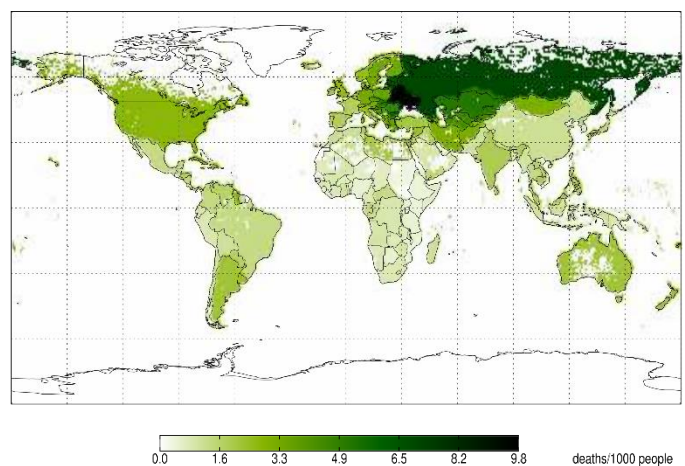

(e) Chronic obstructive pulmonary disease (COPD)

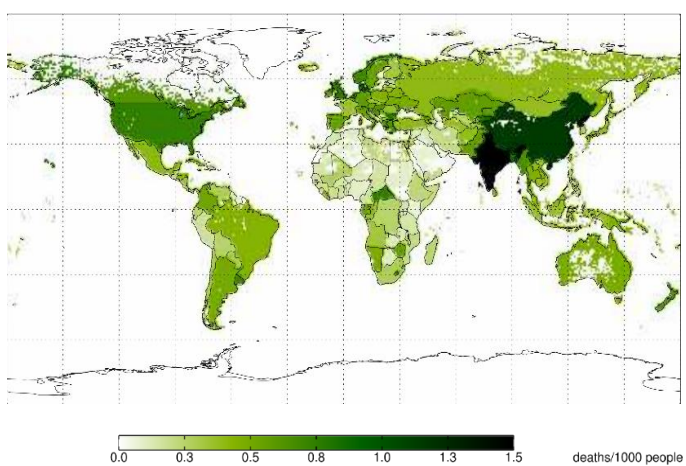

(c) Cerebrovascular disease (STROKE)

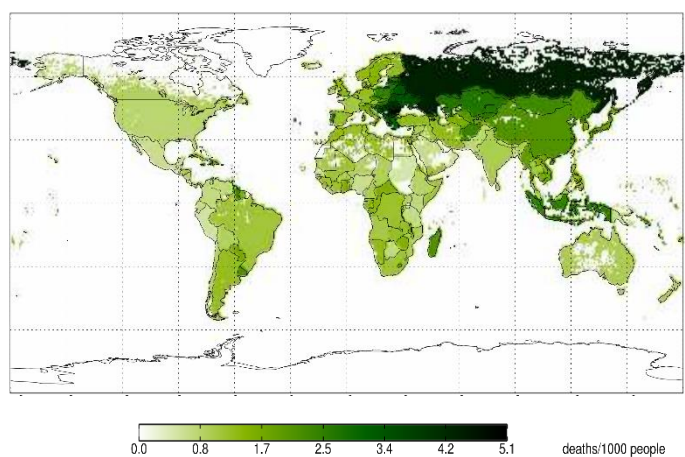

(f) Lung cancer (LC)

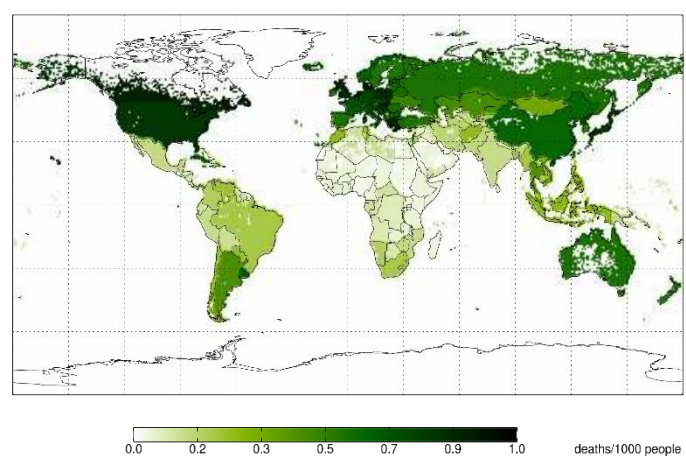

Figure S11– Spatial distribution of exposed population (people per 1,000 square kilometers) and the baseline mortality rates (deaths per year per 1,000 people) for adults aged 25 and above for specific mortality causes, at  $0.5^\circ \times 0.5^\circ$  resolution in 2011. The cause-specific baseline mortality rates for 187 countries are from the GBD 2010 mortality dataset (IHME, 2013)

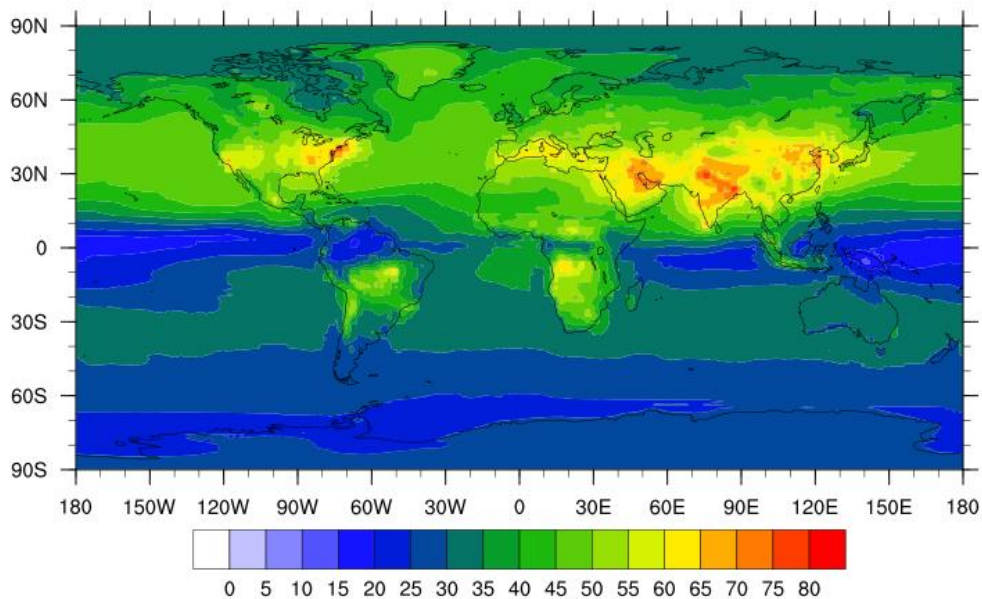

Figure S12 – Spatial distribution of O<sub>3</sub> concentrations for the year 2010 (ppb), showing the multi-model mean (11 models) in each grid cell for the baseline.

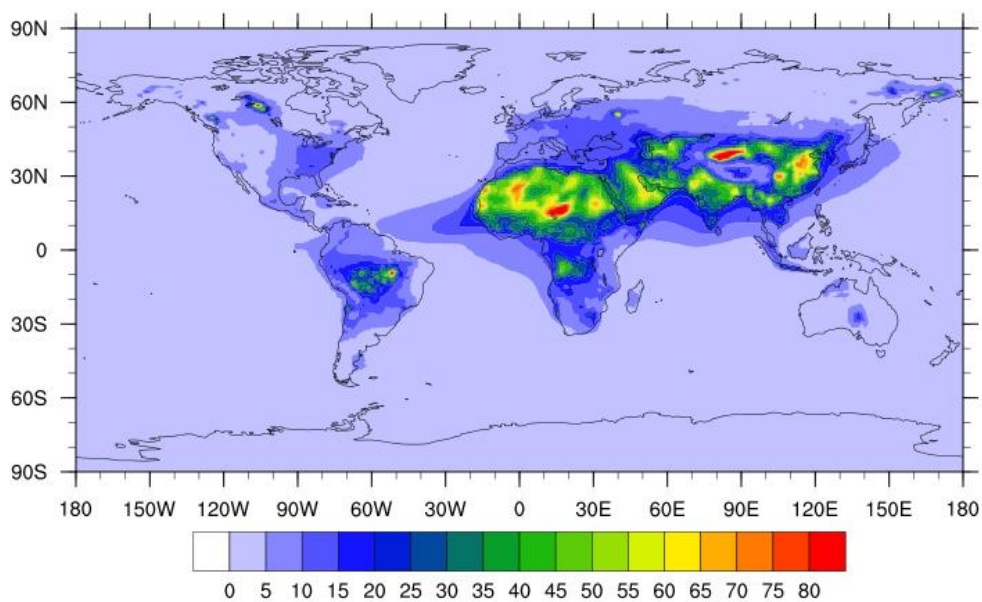

Figure S13 – Spatial distribution of PM<sub>2.5</sub> concentrations for the year 2010 (µg/m<sup>3</sup>), showing the multi-model mean (8 models) in each grid cell for the baseline.





Figure S14 – The spatial distribution of the global difference in individual model O<sub>3</sub> concentrations (ppb) in 20% emission reduction scenarios relative to the baseline for year 2010, for the 6-month O<sub>3</sub> season average of 1-hr. daily maximums.

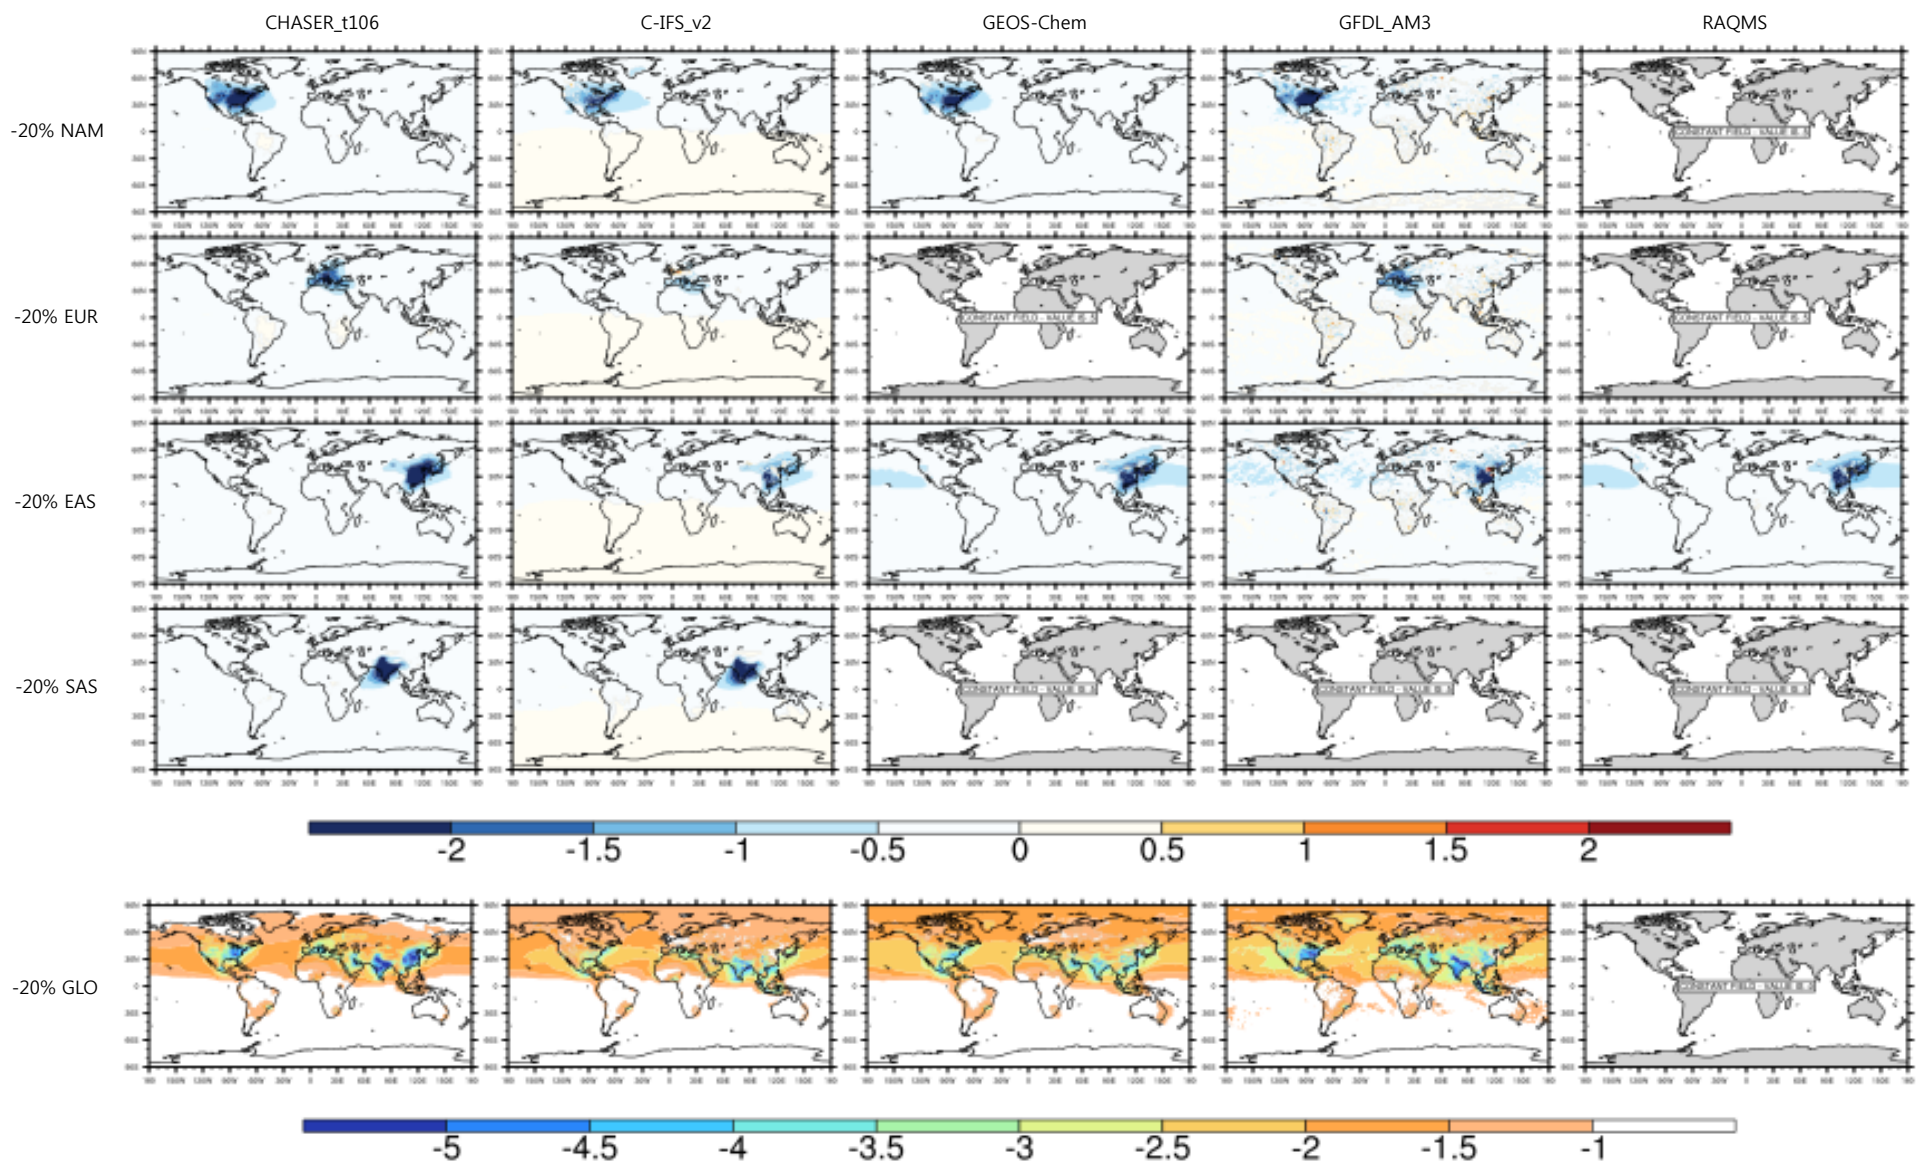

Figure S14 – Continued.



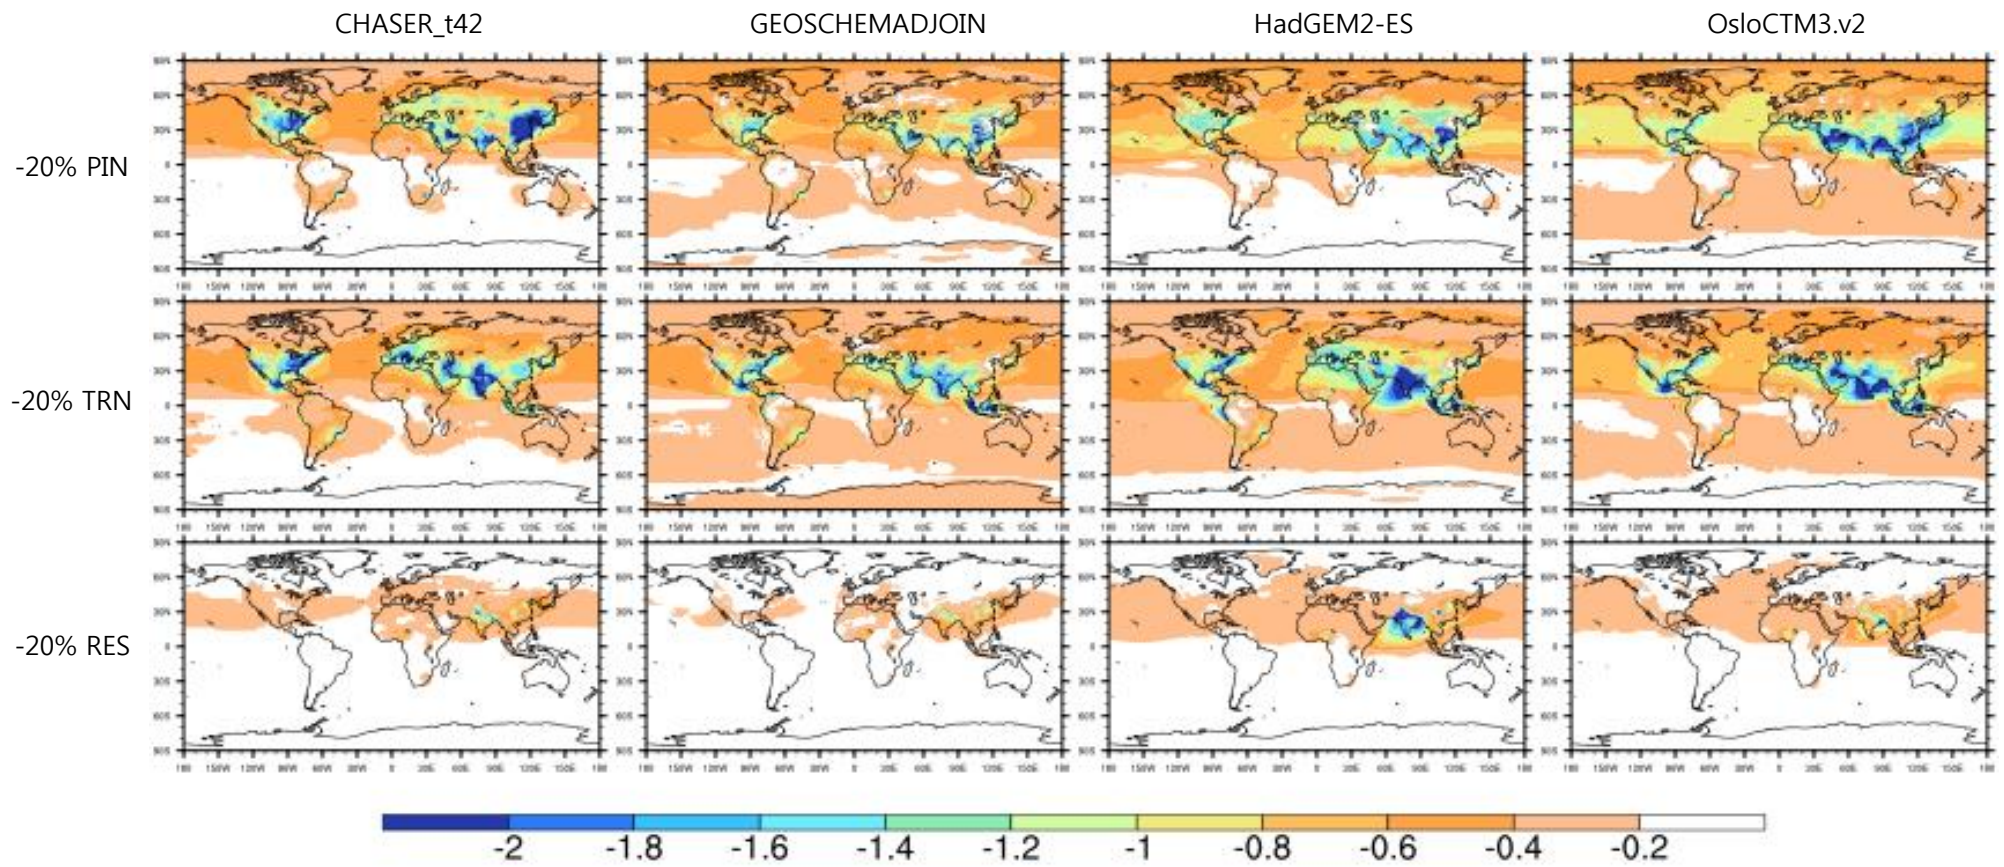

Figure S15 – As Figure S14, but for 20% sectoral emission reductions.

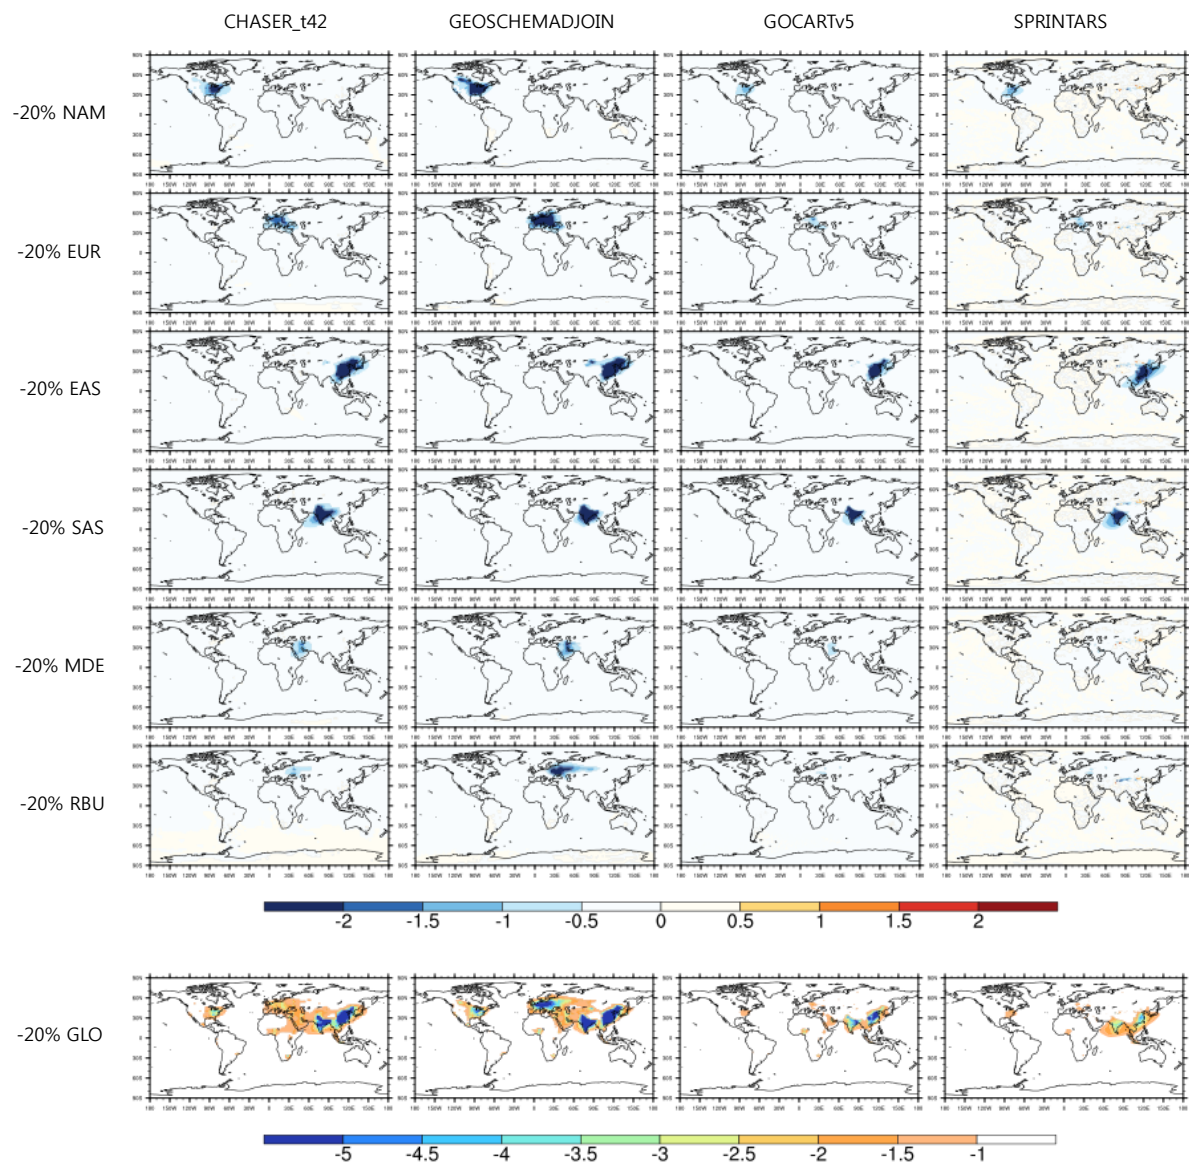

Figure S16 – The spatial distribution of the global difference in individual model annual average PM<sub>2.5</sub> concentrations ( $\mu\text{g}/\text{m}^3$ ) in 20% emission reduction scenarios relative to the baseline for year 2010.



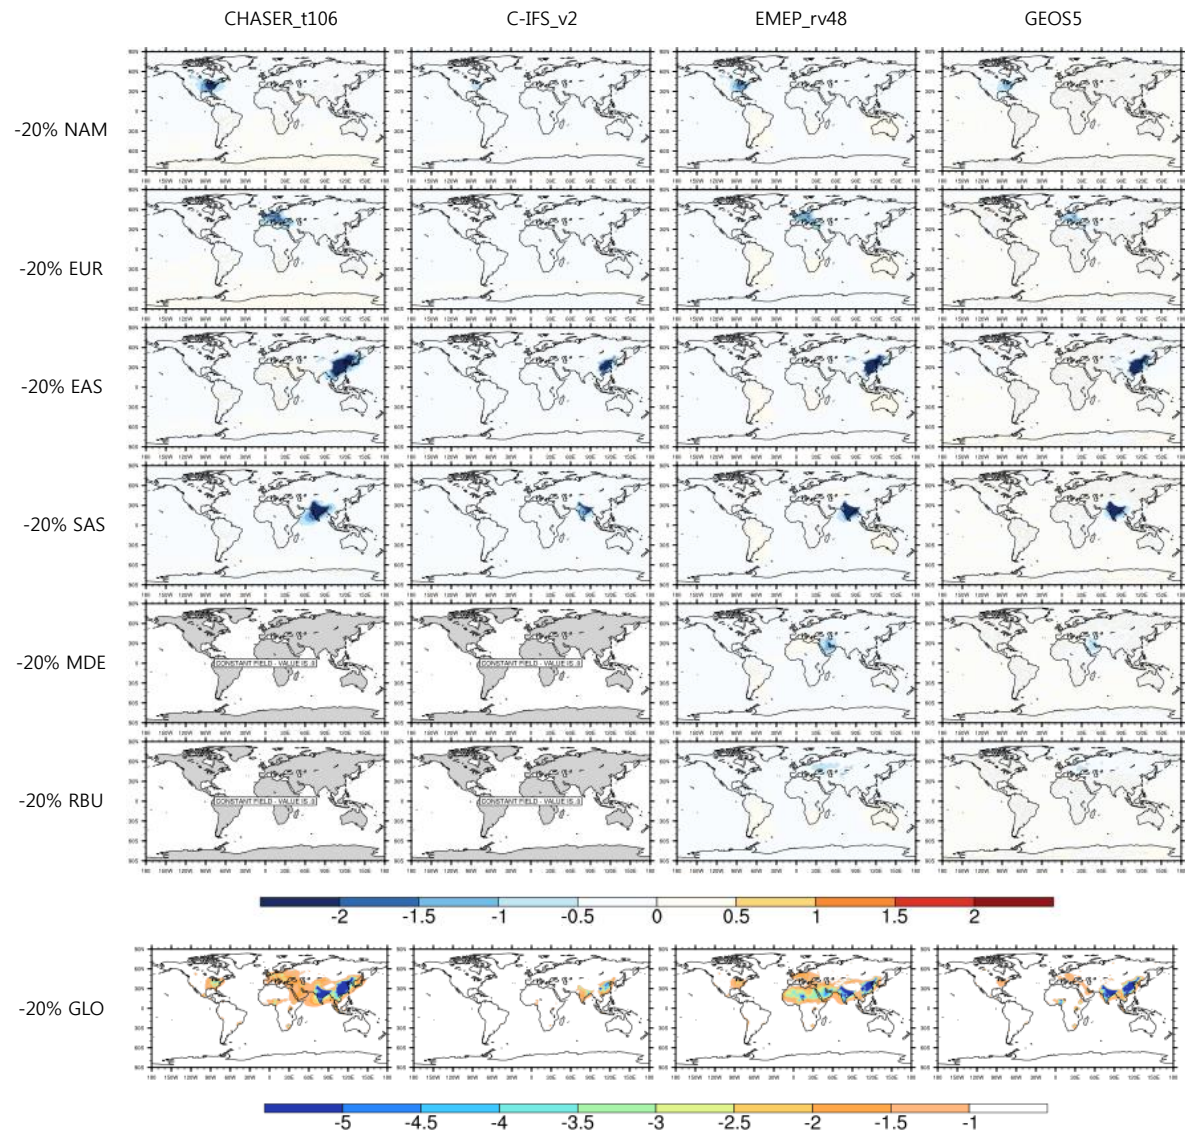

Figure S16 – Continued.

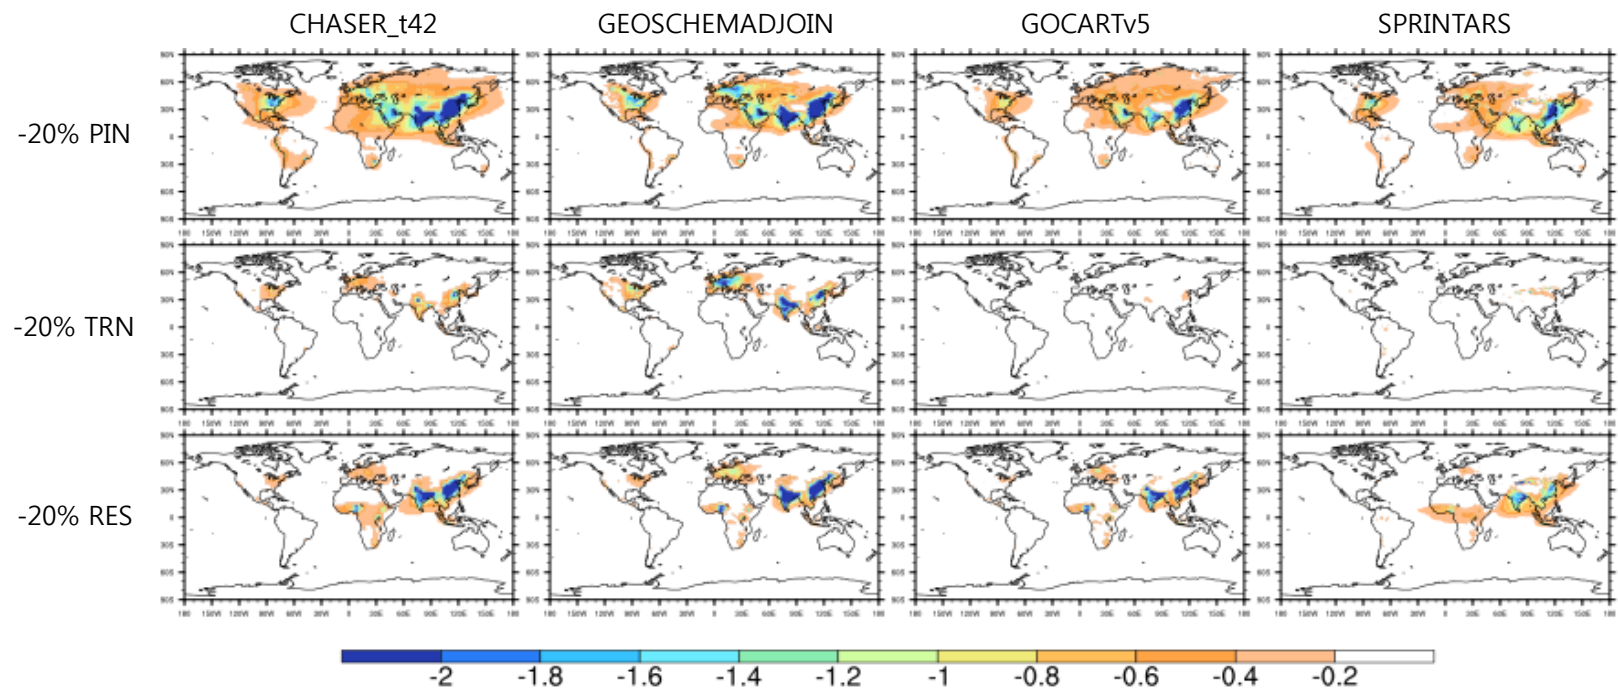

Figure S17 – As Figure S16, but for 20% sectoral emission reductions.

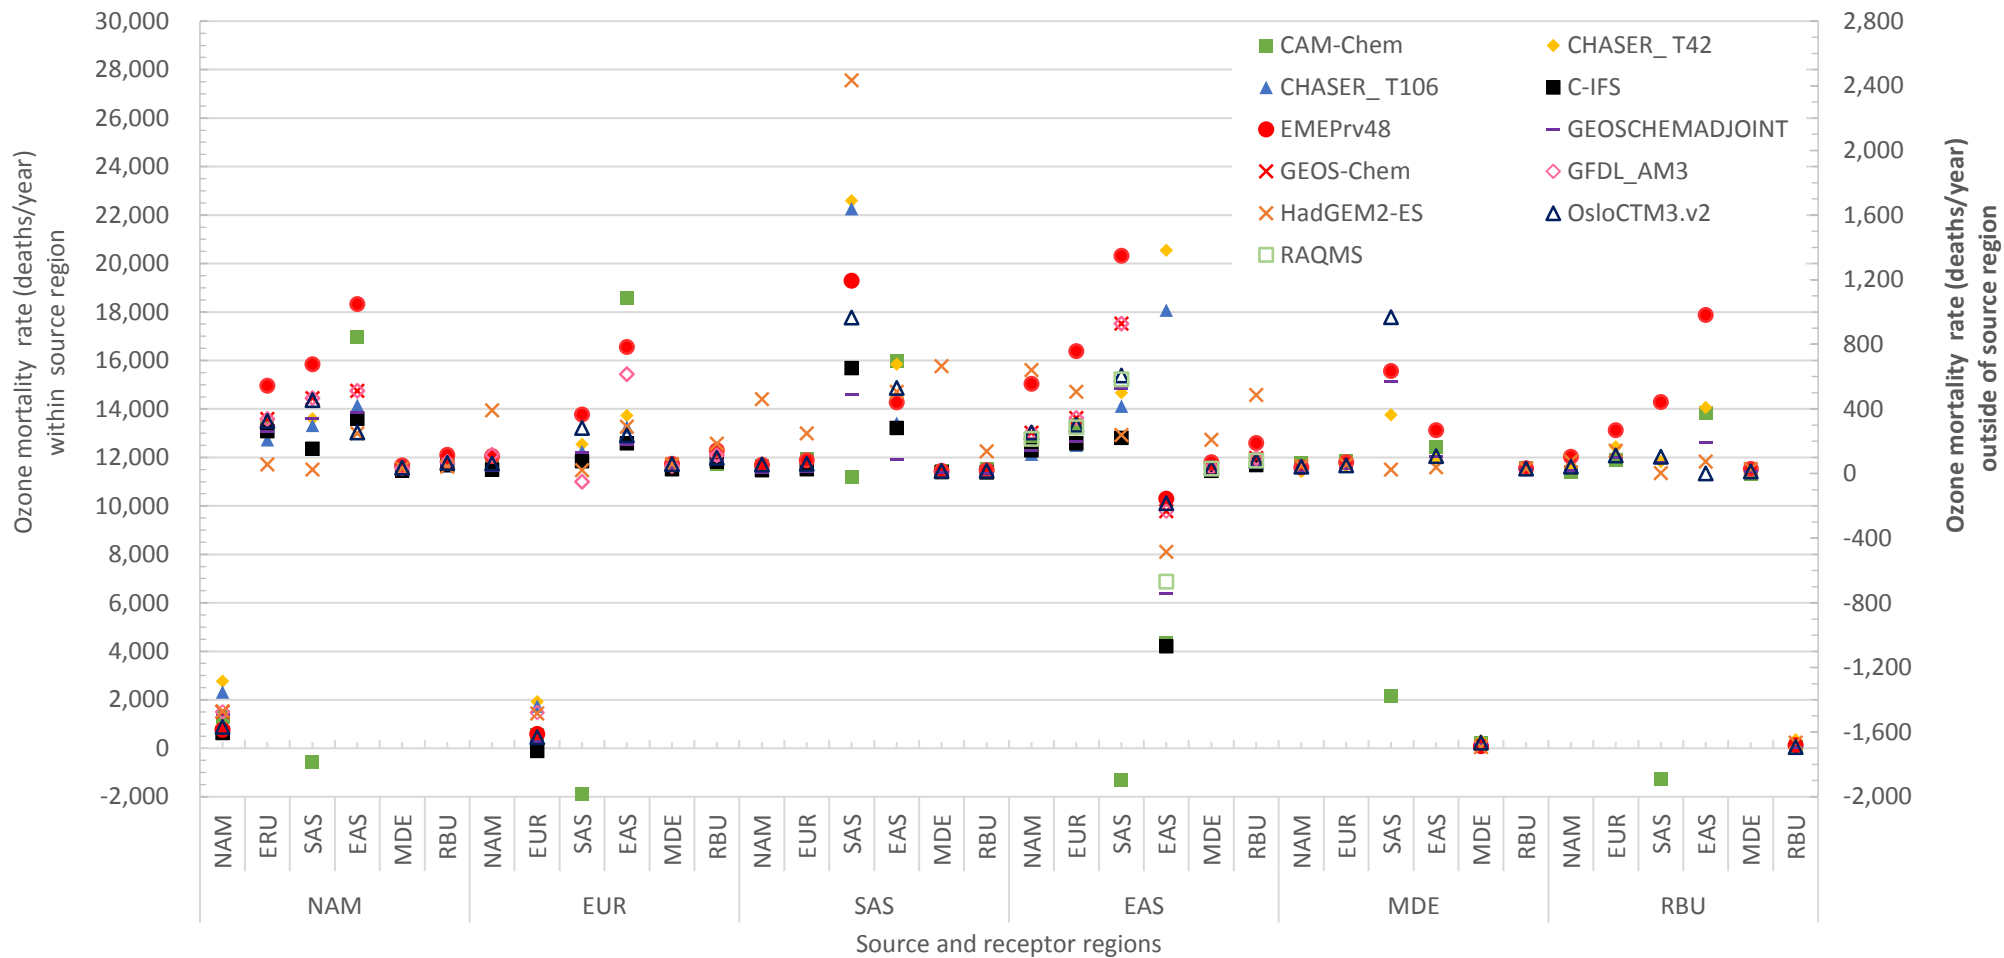

Figure S18 – Annual avoided O<sub>3</sub>-related mortality in each 6 receptor region due to 20 % anthropogenic emission reductions in each 6 source region, as simulated by each of the 11 models. The left y axis shows the avoided deaths within source region itself, while the right represents the avoided deaths outside of the source region. The upper labels on x axis represent the receptor regions, while the six bottom labels represent the source region.

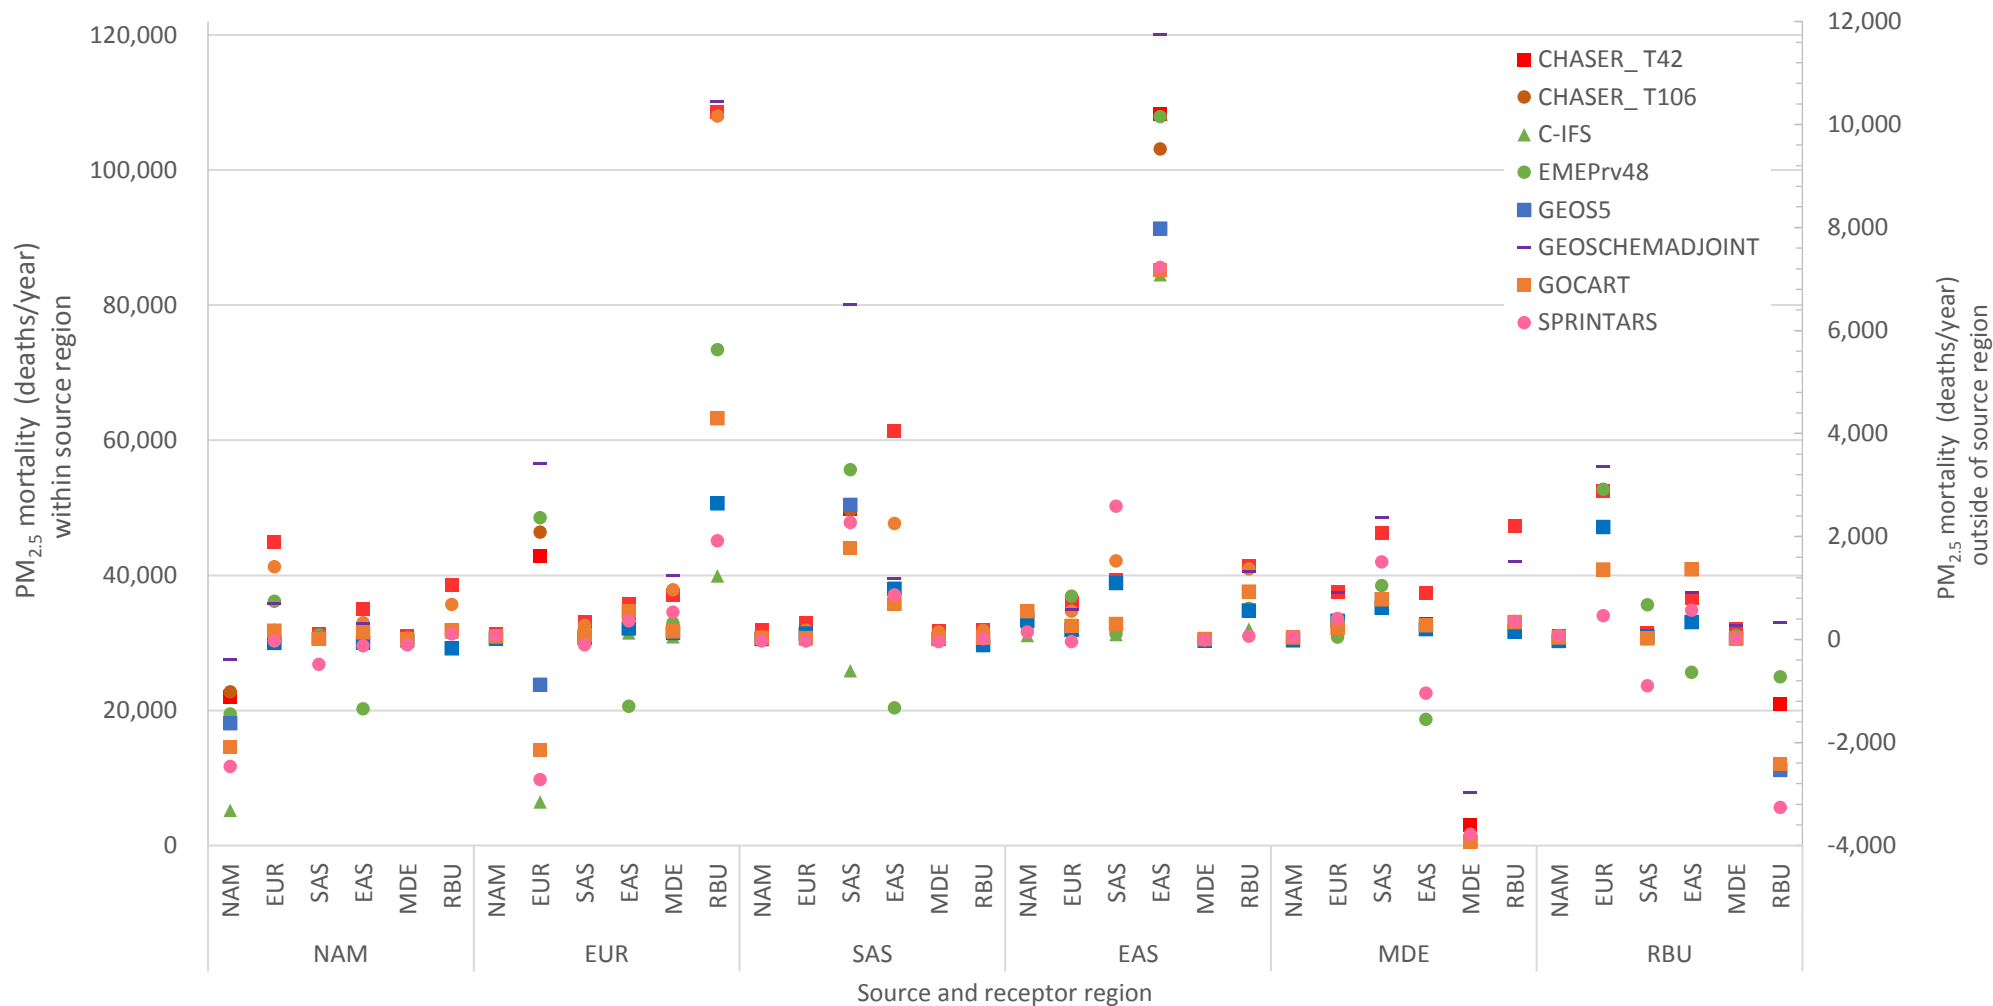

Figure S19 – Annual avoided PM<sub>2.5</sub>-related mortality in each 6 receptor region due to 20 % anthropogenic emission reductions in each 6 source region, as simulated by each of the 8 models. The left y axis shows the avoided deaths within source region itself, while the right represents the avoided deaths outside of source region. The upper labels on x axis represent the receptor regions, while the six bottom labels represent the source region.

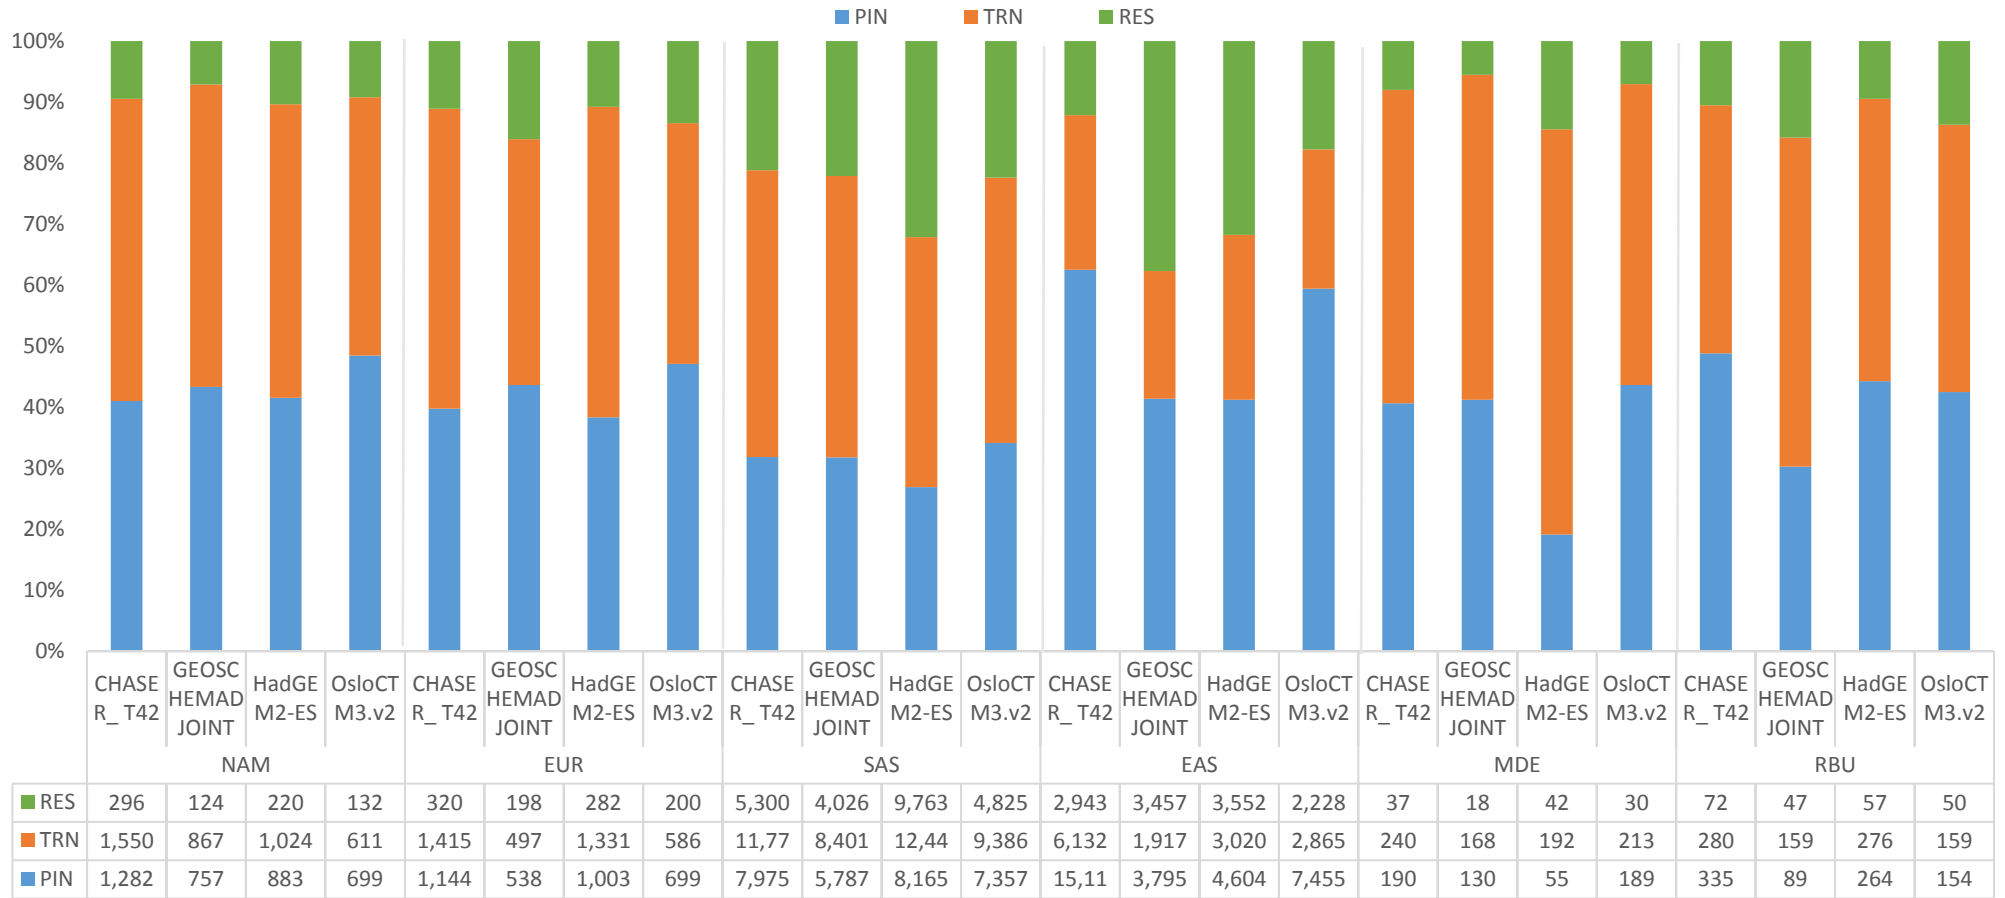

Figure S20 – Annual avoided O<sub>3</sub>-related mortality in the 6 receptor regions due to 20 % anthropogenic emission reductions in 3 source sectors, as simulated by each of the 4 models. The value of y axis represents the percentage of total O<sub>3</sub>-related mortality (sum of 3 sectors) of each sectoral emission reduction for individual models and receptor regions. The upper labels on x axis represent individual model while the bottom labels on x axis represent the receptor regions. The table shows the number of O<sub>3</sub>-related avoided deaths from each sectoral emission reduction estimated by each model in each receptor region.

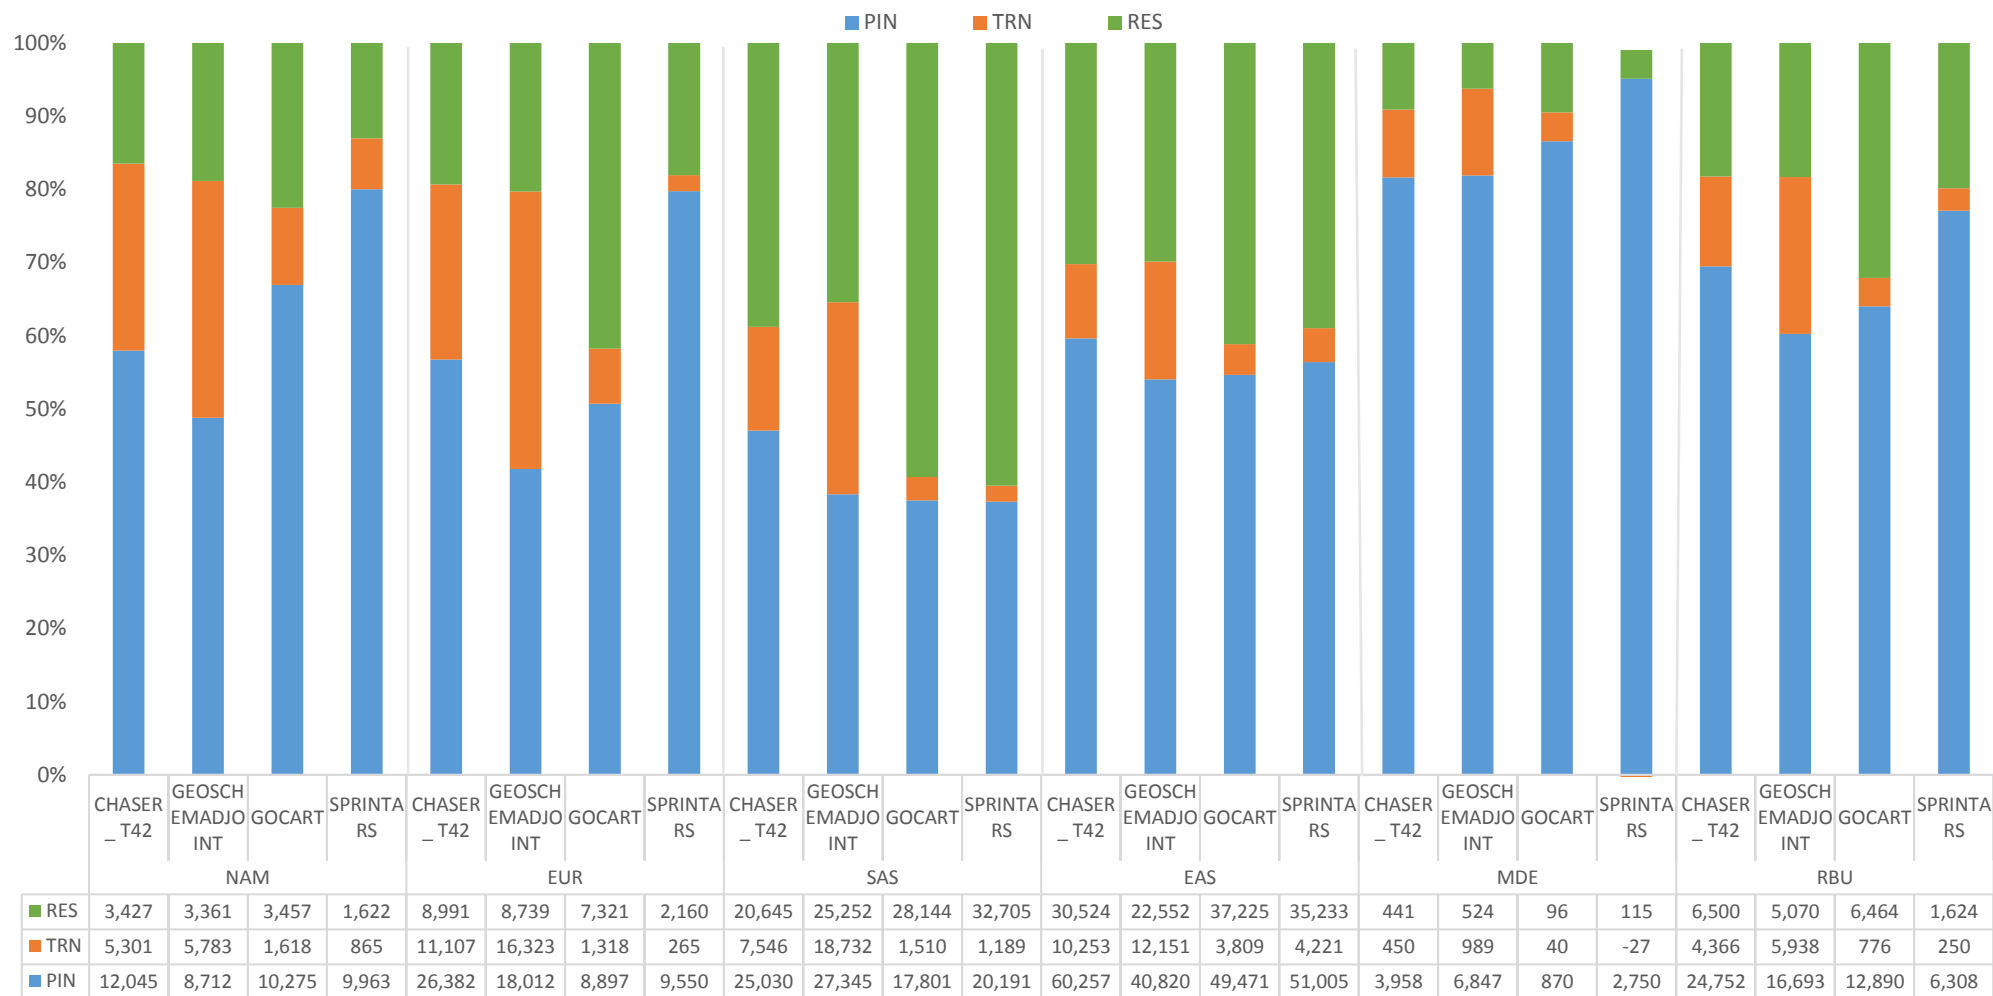

Figure S21 –Annual avoided PM<sub>2.5</sub>-related mortality in the 6 receptor regions due to 20 % anthropogenic emission reductions in 3 source sectors, as simulated by each of the 4 models. The value of y axis represents the percentage of total PM<sub>2.5</sub>-related mortality (sum of 3 sectors) of each sectoral emission reduction for individual models and receptor regions. The upper labels on x axis represent individual models while the bottom labels on x axis represent the receptor region. The table shows the number of PM<sub>2.5</sub>-related avoided deaths from each sectoral emission reduction estimated by each model in each receptor region.



## References

- Bright, E. A., Coleman, P. R., Rose, A. N., and Urban, M. L.: Land-Scan 2011, Oak Ridge National Laboratory SE, Oak Ridge, TN, 2012.
- Bey, I., Jacob, D. J., Yantosca, R. M., Logan, J. A., Field, B. D., Fiore, A. M. et al.: Global modeling of tropospheric chemistry with assimilated meteorology: Model description and evaluation, *J. Geophys. Res.*, 106, 23073-23096, 2001a
- Chin, M., Ginoux, P., Kinne, S., Torres, O., Holben, B. N., Duncan, B. N., Martin, R. V., Logan, J. A., Higurashi, A., and Nakajima, T.: Tropospheric aerosol optical thickness from the GOCART model and comparisons with satellite and sunphotometer measurements, *J. Atmos. Sci.*, 59, 461-483, 2002.
- Colarco, P., da Silva, A., Chin, M., and Diehl, T.: Online simulations of global aerosol distributions in the NASA GEOS-4 model and comparisons to satellite and ground-based aerosol optical depth, *J. Geophys. Res.-Atmos.*, 115, D14207, doi:10.1029/2009JD012820, 2010
- Collins, W. J., Bellouin, N., Doutriaux-Boucher, M., Gedney, N., Halloran, P., Hinton, T., Hughes, J., Jones, C. D., Joshi, M., Liddicoat, S., Martin, G., O'Connor, F., Rae, J., Senior, C., Sitch, S., Totterdell, I., Wiltshire, A., and Woodward, S.: Development and evaluation of an Earth-System model – HadGEM2, *Geosci. Model Dev.*, 4, 1051–1075, doi:10.5194/gmd-4-1051-2011, 2011.
- Flemming, J., Huijnen, V., Arteta, J., Bechtold, P., Beljaars, A., Blechschmidt, A.-M., Diamantakis, M., Engelen, R. J., Gaudel, A., Inness, A., Jones, L., Josse, B., Katragkou, E., Marecal, V., Peuch, V.-H., Richter, A., Schultz, M. G., Stein, O., and Tsikerdekis, A.: Tropospheric chemistry in the Integrated Forecasting System of ECMWF, *Geosci. Model Dev.*, 8, 975–1003, doi:10.5194/gmd-8-975-2015, 2015.
- Henze, D. K., Hakami, A., and Seinfeld, J. H.: Development of the adjoint of GEOS-Chem, *Atmos. Chem. Phys.*, 7, 2413–2433, doi:10.5194/acp-7-2413-2007, 2007
- Institute for Health Metrics and Evaluation (IHME): Global Burden of Disease Study 2010 (GBD 2010) Results by Cause 1990-2010 - Country Level. Seattle, United States, 2013.
- Jones, C. D., Hughes, J. K., Bellouin, N., Hardiman, S. C., Jones, G. S., Knight, J., Liddicoat, S., O'Connor, F. M., Andres, R. J., Bell, C., Boo, K.-O., Bozzo, A., Butchart, N., Cadule, P., Corbin, K. D., Doutriaux-Boucher, M., Friedlingstein, P., Gornall, J., Gray, L., Halloran, P. R., Hurtt, G., Ingram, W. J., Lamarque, J.-F., Law, R. M., Meinshausen, M., Osprey, S., Palin, E. J., Parsons Chini, L., Raddatz, T., Sanderson, M. G., Sellar, A. A., Schurer, A., Valdes, P., Wood, N., Woodward, S., Yoshioka, M., and Zerroukat, M.: The HadGEM2-ES implementation of CMIP5 centennial simulations, *Geosci.*

- Model Dev., 4, 543-570, doi:10.5194/gmd-4-543-2011, 2011.
- Lin, M., Fiore, A.M., Horowitz, L.W., Cooper, O.R., Naik, V., Holloway, J., Johnson, B.J., Middlebrook, A.M., Oltmans, S.J., Pollack, I.B.: Transport of Asian ozone pollution into surface air over the western United States in spring. *J. Geophys. Res.*, 117, D00V07, doi:10.1029/2011JD016961, 2012.
- Lin, M.Y., Horowitz W., Payton R., Fiore A.M, Tonnesen G.: US surface ozone trends and extremes from 1980 to 2014: Quantifying the roles of rising Asian emissions, domestic controls, wildfires, and climate. *Atmos. Chem. Phys.*, doi:10.5194/acp-17-2943-2017, 2017.
- Pierce, B., Schaack, T., Al-Saadi J., Fairlie T. D., Kittaka C., Lingenfelter G., Natarajan M. et al.: Chemical data assimilation estimates of continental U.S. ozone and nitrogen budgets during the Intercontinental Chemical Transport Experiment–North America, *J. Geophys. Res.*, 112, D12S21, doi:10.1029/2006JD007722, 2007.
- Rienecker, M. M., Suarez, M. J., Todling, R., Bacmeister, J., Takacs, L., Liu, H.-C., Gu, W., Sienkiewicz, M., Koster, R. D., Gelaro, R., Stajner, I., and Nielsen, J. E.: The GEOS-5 Data Assimilation System – Documentation of Versions 5.0.1, 5.1.0, and 5.2.0, NASA, Publication series: NASA/TM; 2008-104606, Technical report series on global modeling and data assimilation; Vol. 27, 2008.
- Sudo, K., Takahashi, M., Kurokawa, J.-I., and Akimoto, H.: CHASER: A global chemical model of the troposphere 1. Model description, *J. Geophys. Res.-Atmos.*, 107, ACH 7-1–ACH 7-20, doi:10.1029/2001JD001113, 2002.
- Simpson, D., Benedictow, A., Berge, H., Bergström, R., Emberson, L. D., Fagerli, H., Flechard, C. R., Hayman, G. D., Gauss, M., Jonson, J. E., Jenkin, M. E., Nyíri, A., Richter, C., Semeena, V. S., Tsyro, S., Tuovinen, J.-P., Valdebenito, Á., and Wind, P.: The EMEP MSC-W chemical transport model – technical description, *Atmos. Chem. Phys.*, 12, 7825–7865, doi:10.5194/acp-12- 7825-2012, 2012.
- Søvde, O. A., Prather, M. J., Isaksen, I. S. A., Berntsen, T. K., Stordal, F., Zhu, X., Holmes, C. D., and Hsu, J.: The chemical transport model Oslo CTM3, *Geosci. Model Dev.*, 5, 1441-1469, <https://doi.org/10.5194/gmd-5-1441-2012>, 2012.
- Tilmes, S., Lamarque, J.-F., Emmons, L. K., Kinnison, D. E., Marsh, D., Garcia, R. R., Smith, A. K., Neely, R. R., Conley, A., Vitt, F., Val Martin, M., Tanimoto, H., Simpson, I., Blake, D. R., and Blake, N.: Representation of the Community Earth System Model (CESM1) CAM4-chem within the Chemistry- Climate Model Initiative (CCMI), *Geosci. Model Dev.*, 9, 1853–1890, doi:10.5194/gmd-9-1853-2016, 2016.
- Takemura, T., Nozawa, T., Emori, S., Nakajima, T. Y., and Nakajima, T.: Simulation of climate response to aerosol direct and indirect effects with aerosol transport-radiation model, *J. Geophys. Res.-Atmos.*, 110, D02202,

doi:10.1029/2004JD005029, 2005.

Watanabe, M., Suzuki, T., O'ishi, R., Komuro, Y., Watanabe, S., Emori, S., Takemura, T., Chikira, M., Ogura, T., Sekiguchi, M., Takata, K., Yamazaki, D., Yokohata, T., Nozawa, T., Hasumi, H., Tatebe, H., and Kimoto, M.: Improved Climate Simulation by MIROC5: Mean States, Variability, and Climate Sensitivity, *J. Climate*, 23, 6312–6335, doi:10.1175/2010JCLI3679.1, 2010
